# Supplementary material
Source: publisher site journal article supplement (https://www.dovepress.com/article/286193)
Supplement: Supplementary file 1 [file get_supplementary_file.php]

# Additional file 1 - Results of single studies

Abbreviations: i=intervention; c=control, t1=time point 1, t2=time point 2, +=positive effect, -=negative effect, o=neutral effect, +/- =ambivalent effects

| Authors/Year                                                       | Technology sub-category /Specific technology | Study type & size                                                                         | Target Setting           | Target group for effect                                 | +, -, o, +/- | Effect                                                                                                                                                                                                                                                                            | Level of Evidence |
|--------------------------------------------------------------------|----------------------------------------------|-------------------------------------------------------------------------------------------|--------------------------|---------------------------------------------------------|--------------|-----------------------------------------------------------------------------------------------------------------------------------------------------------------------------------------------------------------------------------------------------------------------------------|-------------------|
| <b>1. Studies on ICT</b>                                           |                                              |                                                                                           |                          |                                                         |              |                                                                                                                                                                                                                                                                                   |                   |
| <b>1.1. Studies on Health Institution Information System (HIS)</b> |                                              |                                                                                           |                          |                                                         |              |                                                                                                                                                                                                                                                                                   |                   |
| Angst, Devaraj et al. 2012 [37]                                    | HIS (hospital)                               | Cross-Sectional (n=2.179 hospitals)                                                       | Hospital                 | Person in need of care                                  | +/-          | Complex outcomes: cardiology IT has positive effect on mortality, administrative IT has negative effect on interpersonal care, positive results if hospitals have very much or very few cardiology IT, negative results if hospitals have very much or very few administrative IT | 4                 |
| Appari, Johnson et al. 2014 [27]                                   |                                              | Cross-Sectional (n=3.002 hospitals)                                                       | Hospital                 | Person in need of care                                  | +            | Positive effect on patient safety indicators (moderate)                                                                                                                                                                                                                           | 4                 |
| McKenna, Dwyer et al. 2017 [36]                                    |                                              | Cohort Study (n= 1.248 hospitals)                                                         | Hospital                 | Person in need of care                                  | +            | Reduction in severity adjusted mortality rate (small)                                                                                                                                                                                                                             | 3                 |
| Restuccia, Cohen et al. 2012 [35]                                  |                                              | Cross-Sectional (n=401 hospitals)                                                         | Hospital                 | Person in need of care<br>Formal Caregiver Organisation | +            | Positive effects on patient mortality and patient satisfaction; not statistically significant positive effect on adherence to the composite Hospital Compare process of care; High HIS-level has positive effect on care quality (perceived by carers)                            | 4                 |
| Steurbaut, Colpaert et al. 2012 [41]                               | HIS (ICU)                                    | Case study (n=2 institutions)                                                             | ICU                      | Formal Caregiver Organisation                           | +            | Positive effect on data extraction of medical procedures                                                                                                                                                                                                                          | 4                 |
| Alexander, Pasupathy et al. 2014 [38]                              | HIS (nursing home)                           | Mixed Methods (Cross-Sectional (n=5 nursing homes), qualitative, social network analysis) | Inpatient long-term care | Organisation                                            | +/-          | Less interaction (communication) intensity in institutions with high HIS-levels                                                                                                                                                                                                   | 4                 |
| Alexander, Steege et al. 2015 [39]                                 |                                              | Case study (n=2 nursing homes)                                                            | Inpatient long-term care | Organisation                                            | +            | Positive effect on communication (more robust and integrated communication strategies)                                                                                                                                                                                            | 4                 |
| Munyisia, Yu et al. 2012 [40]                                      |                                              | Case study (n=2 institutions)                                                             | Inpatient long-term care | Organisation                                            | +/-          | Percentage of time spent on documentation by cares decreased at 3 months, increased at 6 months, decreased at 23 months                                                                                                                                                           | 4                 |
| Patmon, Gee et al. 2016 [42]                                       | HIS (subsystem/ patient engagement)          | Qualitative (n=38)                                                                        | Hospital                 | Person in need of care<br>Formal Caregiver              | +            | Positive effects on patient distraction and patient education (perceived by nurses)<br>Positive effect on care delivery (perceived by nurses)                                                                                                                                     | 4                 |

| Authors/Year                                                                | Technology sub-category / Specific technology | Study type & size                                                            | Target Setting           | Target group for effect                    | +, -, o, +/- | Effect                                                                                                                                                                                                                                                                                          | Level of Evidence |
|-----------------------------------------------------------------------------|-----------------------------------------------|------------------------------------------------------------------------------|--------------------------|--------------------------------------------|--------------|-------------------------------------------------------------------------------------------------------------------------------------------------------------------------------------------------------------------------------------------------------------------------------------------------|-------------------|
| <b>1.2. Studies on Electronic Health Records/Electronic Medical Records</b> |                                               |                                                                              |                          |                                            |              |                                                                                                                                                                                                                                                                                                 |                   |
| Hitt and Tambe 2016 [56]                                                    | EMR in long-term care                         | Cross-Sectional (n=304)                                                      | Inpatient long-term care | Organisation                               | +            | Neutral effect on quality of care indicators, small increases in productivity                                                                                                                                                                                                                   | 4                 |
| Meehan 2017 [57]                                                            |                                               | Qualitative (n=20)                                                           | Inpatient long-term care | Organisation                               | +            | Positive effect on quality of care (perceived by nurses), better readability of records, improved accessibility of information                                                                                                                                                                  | 4                 |
| Rantz, Alexander et al. 2011 [58]                                           |                                               | Qualitative (n=5 focus groups with 120 participants in total)                | Inpatient long-term care | Organisation                               | +/-          | Positive effects on communication between caregiver and doctor, follow-up care, access to information, safety of care delivery<br>Negative effects on time spent with patient (reduced) and on documentation (increased), double documentation, negative effect on accuracy of care information | 4                 |
| Mitchell and Yaylacicegi 2012 [43]                                          | EMR in hospitals in general                   | Cross-Sectional (n=252 hospitals)                                            | Hospital                 | Person in need of care                     | +            | Positive effects on patient safety in medium sized hospitals, positive effect on post-operative safety and mortality in large hospitals                                                                                                                                                         | 4                 |
| Bradley 2011 [44]                                                           |                                               | Qualitative (n=18)                                                           | Hospital                 | Person in need of care<br>Formal Caregiver | +            | Positive effect on patient safety and patient trust (perceived by nurses)<br>Positive effect on nurse-patient relationship                                                                                                                                                                      | 4                 |
| Takian, Sheikh et al. 2012 [45]                                             |                                               | Case study (interviews n=48, observations 26 hours, document analysis: n=65) | Hospital                 | Organisation                               | +            | Positive effect on data and information sharing, faster communication, reduced patient risk for poor treatment (but implementation very challenging)                                                                                                                                            | 4                 |
| Yusof 2015 [46]                                                             |                                               | Case study (interviews n=7, observations: n=33, document analysis: n=34)     | ICU                      | Organisation                               | +            | Reduced documentation and data access time, positive effect on clinical workflow, positive effect on work effectiveness                                                                                                                                                                         | 4                 |
| Lo, Lee et al. 2014 [165]                                                   | Decision support/Data results management      | Quasi-Experiment (i: n=120, c: n=120)                                        | Hospital                 | Organisation                               | +            | Reduced time spent on surveillance work                                                                                                                                                                                                                                                         | 2                 |
| Seibert, Maddox et al. 2014 [47]                                            | Medication Administration                     | Quasi-Experiment (pre/post-design n=10 units in 1 hospital)                  | Hospital                 | Organisation                               | +            | Increased medication administration accuracy, reduced number of target errors                                                                                                                                                                                                                   | 2                 |
| Appari, Carian et al. 2012 [27]                                             |                                               | Cross-Sectional (n=2.603 hospitals)                                          | Hospital                 | Organisation                               | +            | Positive effect on adherence to medication guidelines (no effect of implementation of CPOE alone)                                                                                                                                                                                               | 4                 |
| Chanyagorn, Kungwannarongkun et al. 2016 [49]                               |                                               | User study (n=50)                                                            | Hospital                 | Person in need of care                     | +            | Errors down to almost zero                                                                                                                                                                                                                                                                      | 4                 |
| Ching, Williams et al. 2014 [50]                                            |                                               | Case study (n=1 hospital)                                                    | Hospital                 | Organisation                               | +            | Reduced numbers of medication errors, safe practice violations, unsafe administration practices                                                                                                                                                                                                 | 4                 |

| Authors/Year                                                 | Technology sub-category / Specific technology              | Study type & size                                                                                                       | Target Setting            | Target group for effect             | +, -, o, +/- | Effect                                                                                                                                                                                                | Level of Evidence |
|--------------------------------------------------------------|------------------------------------------------------------|-------------------------------------------------------------------------------------------------------------------------|---------------------------|-------------------------------------|--------------|-------------------------------------------------------------------------------------------------------------------------------------------------------------------------------------------------------|-------------------|
| Huang and Lee 2011 [51]                                      | Medication Administration                                  | Case study (interviews: n=6, observations: n=86)                                                                        | Hospital                  | Organisation                        | +            | Positive effects on nursing workflow, medication safety, encountering operational difficulties, reduced time spent with indirect patient care and medication administration (all perceived by nurses) | 4                 |
| Clarke, Patel et al. 2017 [53]                               | Patient handoff/health information exchange                | Quasi-Experiment (i: n=271, c: n=203)                                                                                   | Cross sectoral care       | Formal Caregiver Organisation       | +            | Positive effect on handoff compliance, reduced communication errors, positive effect on trainee workflow                                                                                              | 2                 |
| Oakley and Hunter 2017 [52]                                  |                                                            | Quasi-Experiment (pre/post-design n=1 hospital)                                                                         | Hospital                  | Formal Caregiver Organisation       | +            | Reduced workload for caregivers, reduced handover-list errors                                                                                                                                         | 2                 |
| Yeaman, Ko et al. 2015 [28]                                  |                                                            | Quasi-Experiment (pre/post-design n=5 institutions)                                                                     | Cross sectoral care       | Person in need of care              | +            | Positive effect on patient 30 days readmission rate, reduced emergency department return visits                                                                                                       | 2                 |
| Meyer-Delpho and Schubert 2014 [29]                          |                                                            | Case study (n=1 institution, survey: n=26)                                                                              | Cross sectoral care       | Organisation                        | +            | Reduced number of incomplete documentations, reduced treatment/handling time                                                                                                                          | 4                 |
| Lear and Walters 2015 [38]                                   | Patient information administration/ Nurse reminding system | Quasi-Experiment (pre/post-design n=32)                                                                                 | Hospital                  | Formal Caregiver                    | o            | No statistically significant effect on documentation compliance; nurses expressed discomfort with system                                                                                              | 2                 |
| Paranilam 2013 [55]                                          |                                                            | Quasi-Experiment (pre: n=95, post: n=103)                                                                               | Hospital                  | Person in need of care Organisation | o            | No effect on pain intensity for patients<br>No effect on frequency of pain measurements                                                                                                               | 2                 |
| <b>1.3. Studies on Computerised Decision Support Systems</b> |                                                            |                                                                                                                         |                           |                                     |              |                                                                                                                                                                                                       |                   |
| Lapane, Hughes et al. 2011 [62]                              | Risk assessment                                            | RCT (i: n=12 nursing homes, c: n=13 nursing homes)                                                                      | Inpatient long-term care  | Person in need of care              | +            | Positive effect on delirium, other results not statistically significant, but some positive trends                                                                                                    | 1b                |
| Dykes, I-Ching et al. 2012 [63]                              |                                                            | Case-control (case: n=48, c: n=144)                                                                                     | Hospital                  | Person in need of care              | +            | Reduced number of falls                                                                                                                                                                               | 2                 |
| Lang 2012 [64]                                               | Care Decisions                                             | Quasi-Experiment (pre/post-design n=331)                                                                                | Hospital                  | Formal caregiver                    | +            | Positive effect on guideline compliance                                                                                                                                                               | 2                 |
| Salinas, Chung et al. 2011 [65]                              |                                                            | Quasi-Experiment (i: n=32, c: n=39)                                                                                     | ICU                       | Person in need of care              | +            | Positive effects on mortality, resuscitation volume, total fluid volume, crystalloids post-ICU admission, urinary output, ventilation free days, no effect on ICU free days                           | 2                 |
| <b>1.4. Studies on Telecare</b>                              |                                                            |                                                                                                                         |                           |                                     |              |                                                                                                                                                                                                       |                   |
| van der Heide, Willems et al. 2012 [75]                      | Video-Telecare                                             | Quasi-Experiment (pre/post-design pre: n=130, post: n=85)                                                               | Outpatient long-term care | Person in need of care              | +/-          | Positive effect on social and emotional loneliness, ambivalent effect on feeling of safety                                                                                                            | 2                 |
| Cady 2012 [78]                                               |                                                            | Mixed Methods: Cognitive Ethnography & quantitative time-motion work-flow analysis (n=3 nurses; n=57 children/families) | Hospital/Home             | Organisation                        | o/-          | Negative effect on required time for tasks caused by technical problems in triage office<br>Neutral effect in care coordination office                                                                | 4                 |

| Authors/Year                             | Technology sub-category / Specific technology   | Study type & size                                                                              | Target Setting            | Target group for effect                      | +, -, o, +/- | Effect                                                                                                                                                                                                                                                                    | Level of Evidence |
|------------------------------------------|-------------------------------------------------|------------------------------------------------------------------------------------------------|---------------------------|----------------------------------------------|--------------|---------------------------------------------------------------------------------------------------------------------------------------------------------------------------------------------------------------------------------------------------------------------------|-------------------|
| Cady and Finkelstein 2014 [72]           | Video-Telecare                                  | Mixed Methods : Cognitive Ethnography & quantitative time-motion workflow analysis (n=1 nurse) | Hospital/Home             | Organisation                                 | o            | No effect on workflow<br>Neutral effect on required time of video versus telephone coordinated care                                                                                                                                                                       | 4                 |
| Bowles, Hanlon et al. 2011 [69]          | Video Telecare incl. remote monitoring          | RCT (i: n=27, c: n=26)                                                                         | Outpatient long-term care | Person in need of care                       | +            | Positive effect on hospital readmission (not statistically significant)<br>secondary outcomes: positive effects on access to care and patient satisfaction (significant)                                                                                                  | 1b                |
| Steventon, Bardsley et al. 2013 [73]     | Remote health-monitoring                        | RCT (i: n=1276, c: n=1324)                                                                     | Primary Care/Home         | Person in need of care                       | o            | Not statistically significant positive effect on hospital admissions (within 12 month)<br>No effect on mortality, social care use, contact with GPs, admissions to residential or nursing care;                                                                           | 1b                |
| Wakefield and Vaughan-Sarrazin 2017 [74] |                                                 | Cross-Sectional (n=123)                                                                        | Primary Care/Home         | Person in need of care<br>Informal caregiver | o            | No differences between home-telehealth users and non-telehealth user identified                                                                                                                                                                                           | 4                 |
| Paré, Poba-Nzaou et al. 2013 [70]        |                                                 | Quasi-Experiment (pre/post-design n=95)                                                        | Outpatient long-term care | Person in need of care                       | +            | Reduction in number of hospitalisations, reduced length of hospital stays, fewer emergency room visits                                                                                                                                                                    | 2                 |
| Chiang and Wang 2016 [76]                | Telecare per Instant-Messaging                  | Qualitative (n=17)                                                                             | Outpatient long-term care | Formal caregiver<br>Organisation             | +/-          | Reduction in workload and stress/ disturbances in personal life<br>Reduction in medical service consumption, facilitating improvement in quality of care, positive effect on nurse-patient relationship, problems in data protection, usability in emergencies restricted | 4                 |
| Göransson, Eriksson et al. 2017 [71]     | Telecare/ App supported                         | Qualitative (n=29)                                                                             | Outpatient long-term care | Person in need of care                       | +            | Positive effect on self-confidence, positive effect on self-perceived "sense of security"                                                                                                                                                                                 | 4                 |
| Hicken, Daniel et al. 2017 [77]          | Telecare/ Internet- vs. telephone-based support | RCT (i1: n=77, c: n=78; i2: N=30, c: n=44)                                                     | Primary Care/Home         | Informal caregiver (dementia)                | +/o          | No differences in majority of comparative effectiveness outcomes, but some positive effects for subgroup of experienced internet users (positive effect on grief/isolation)                                                                                               | 1b                |

## 1.5. Studies on Communication Support Technologies

### 1.5.1. Communication Support between professionals

|                                      |                                          |                                                             |          |                        |   |                                                                                                                                                         |   |
|--------------------------------------|------------------------------------------|-------------------------------------------------------------|----------|------------------------|---|---------------------------------------------------------------------------------------------------------------------------------------------------------|---|
| Chuang, Liu et al. 2015 [82]         | Cloud based smartphone nurse-call system | Quasi-Experiment (pre/post-design n=5)                      | Hospital | Organisation           | + | Reduction of response time of nurses                                                                                                                    | 2 |
| Pemmassani, Paget et al. 2014 [83]   | Hands free communication                 | Quasi-Experiment (pre/post-design n=12)                     | Hospital | Formal caregiver       | + | Reduced walking distance                                                                                                                                | 2 |
| Tielbur, Rice Cella et al. 2015 [84] | Discharge huddle with mobile technology  | Quasi-Experiment (pre-post-design; pre: n=226, post: n=188) | Hospital | Person in need of care | + | Reduced length of stay, reduced number of patients going out without service, increased number of discharges to affiliated partners (care institutions) | 2 |

| Authors/Year                                                                    | Technology sub-category / Specific technology                                        | Study type & size                                                                                                | Target Setting            | Target group for effect                                    | +, -, o, +/- | Effect                                                                                                                                                                                                                                                                                        | Level of Evidence |
|---------------------------------------------------------------------------------|--------------------------------------------------------------------------------------|------------------------------------------------------------------------------------------------------------------|---------------------------|------------------------------------------------------------|--------------|-----------------------------------------------------------------------------------------------------------------------------------------------------------------------------------------------------------------------------------------------------------------------------------------------|-------------------|
| White, McIlfratrick et al. 2015 [85]                                            | Tele-conferencing for remote training of health care providers                       | Quasi-Experiment (pre/post-design n=28)                                                                          | Outpatient long-term care | Formal caregiver                                           | +            | Positive effect on knowledge and skills; positive effect on self-efficacy score (communication skills, assessment and care planning, wellbeing, symptom management, advanced care planning)                                                                                                   | 2                 |
| Blakey, Guy et al. 2012 [86]                                                    | Wireless call handling and task management system (out of hours)                     | Case study (n= 1 hospital)                                                                                       | Hospital                  | Person in need of care<br>Formal caregiver<br>Organisation | +            | Reduced length of stay, positive effect on cardiac arrest calls, reduced number of untoward incidents related to handover and medical response<br>Positive effect on user satisfaction (staff)<br>Coordination time for care-coordinator reduced                                              | 4                 |
| Melby, Brattheim et al. 2015 [87]                                               | Hospital-home care collaboration by electronic messaging                             | Qualitative (n=41)                                                                                               | Cross sectoral care       | Organisation                                               | +            | Positive effects on efficiency of communication, information content, safer patient transitions (perceived by nurses)                                                                                                                                                                         | 4                 |
| Wu, Rossos et al. 2011 [90]                                                     | Smartphone use in clinical communication                                             | Mixed methods (interviews (n=31), ethnographic observations, frequency analysis of e-mails and smartphone calls) | Hospital                  | Organisation                                               | +/-          | Improvement in efficiency compared to pagers, increase of mobility and multitasking abilities for residents; Increase of interruptions, worsening of interprofessional relationships (perceived by nurses), discordances between nurses and doctors with respect to what is considered urgent | 4                 |
| <b>1.5.2. Communication support between professionals and patient/relatives</b> |                                                                                      |                                                                                                                  |                           |                                                            |              |                                                                                                                                                                                                                                                                                               |                   |
| Rodriguez 2016 [88]                                                             | Communication between formal caregiver and patient/ for suddenly speechless patients | Quasi-Experiment (i: n=52, c: n=63)                                                                              | Hospital                  | Person in need of care                                     | +            | Reduced mean frustration, increased satisfaction with communication method (perceived by patients)                                                                                                                                                                                            | 2                 |
| Wieck, Blake et al. 2017 [89]                                                   | Communication between professionals and relatives /intraoperative communication      | Case study (n=50 families, n=29 nurses, n=19 surgeons)                                                           | Hospital                  | Informal caregiver<br>Organisation                         | +            | Positive effect on family satisfaction with intraoperative communication<br>Positive effect on intraoperative communication, increased ease in finding relatives post-op                                                                                                                      | 4                 |
| <b>1.6. Studies on Specific Software/Apps</b>                                   |                                                                                      |                                                                                                                  |                           |                                                            |              |                                                                                                                                                                                                                                                                                               |                   |
| <b>1.6.1. Care support for professionals</b>                                    |                                                                                      |                                                                                                                  |                           |                                                            |              |                                                                                                                                                                                                                                                                                               |                   |
| Webster and Hanson 2014 [104]                                                   | Provision of information about residents                                             | User study (n=44)                                                                                                | Inpatient long-term care  | Organisation                                               | +            | Positive effects on caregivers' knowledge about patients and engagement with patients                                                                                                                                                                                                         | 4                 |
| Yi-Sheng, Hsin-Ju et al. 2014 [105]                                             | Point of care documentation                                                          | User study. (i: n=11 measurements, c: n=31 measurements)                                                         | Hospital                  | Organisation                                               | +            | Reduced time needed for measurement, positive effect on process efficiency                                                                                                                                                                                                                    | 4                 |
| Florczak, Scheurich et al. 2012 [106]                                           | Point of care wound documentation                                                    | Case study (n=9)                                                                                                 | Inpatient long-term care  | Organisation                                               | +            | Positive effect on wound management effectiveness scale                                                                                                                                                                                                                                       | 4                 |

| Authors/Year                                                           | Technology subcategory / Specific technology | Study type & size                                                                | Target Setting                 | Target group for effect                                 | +, -, o, +/- | Effect                                                                                                                                                                                                                                                                                                                              | Level of Evidence |
|------------------------------------------------------------------------|----------------------------------------------|----------------------------------------------------------------------------------|--------------------------------|---------------------------------------------------------|--------------|-------------------------------------------------------------------------------------------------------------------------------------------------------------------------------------------------------------------------------------------------------------------------------------------------------------------------------------|-------------------|
| Vowden and Vowden 2013 [107]                                           | Wound monitoring and remote support          | Case Study/Pilot RCT (i: n=17, c: n=9)                                           | Inpatient long-term care       | Person in need of care                                  | +            | Two case studies show improved patient outcomes, main benefit: positive effect on ease of monitoring progress of wounds                                                                                                                                                                                                             | 4                 |
| <b>1.6.2. Care support for informal caregivers</b>                     |                                              |                                                                                  |                                |                                                         |              |                                                                                                                                                                                                                                                                                                                                     |                   |
| Mierlo, Meiland et al. 2015 [102]                                      | Dementia specific digital social chart       | RCT (i: n=41 caregiver, n=13 case manager; c: n=32 caregiver, n=14 case manager) | Home                           | Person in need of care (dementia)<br>Informal caregiver | +/-          | No significant differences for persons in need of care with respect to needs assessment, QoL, Neuropsychiatric Inventory at 6 months, more needs and unmet needs reported for intervention group at 12 months; Increase in sense of competence at 12 months                                                                         | 1b                |
| <b>1.6.3. Patient support for everyday life</b>                        |                                              |                                                                                  |                                |                                                         |              |                                                                                                                                                                                                                                                                                                                                     |                   |
| Nijhof, van Gemert-Pijnen et al. 2013 [103]                            | Personal assistant for dementia              | Qualitative (n=16)                                                               | Home                           | Person in need of care (dementia)<br>Informal caregiver | +            | Positive effects on well-being, structuring the day, doing things independently for some patients (perceived by others)<br>No effect on burden on the family, some positive effects mentioned by single caregivers                                                                                                                  | 4                 |
| <b>1.6.4. Therapeutic support for patients/persons in need of care</b> |                                              |                                                                                  |                                |                                                         |              |                                                                                                                                                                                                                                                                                                                                     |                   |
| Zaccarelli, Cirillo et al. 2013 [96]                                   | Cognitive stimulation                        | RCT (i: n=174, c: n=174)                                                         | undefined                      | Person in need of care (dementia)                       | +            | Improved cognitive functions (mainly memory and executive functions)                                                                                                                                                                                                                                                                | 1b                |
| Zhuang, Fang et al. 2013 [97]                                          |                                              | RCT (i: n=19, c: n=14)                                                           | Inpatient long-term care       | Person in need of care (dementia)                       | o            | Neutral effect on cognitive examination score, but tendencies for improvements in intervention group (for memory, language and visuospatial ability)                                                                                                                                                                                | 1b                |
| Berenbaum, Lange et al. 2011 [98]                                      |                                              | Case study (n=80)                                                                | Inpatient long-term / day care | Person in need of care (dementia)                       | +            | Positive comments on mood and QoL while using the programme                                                                                                                                                                                                                                                                         | 4                 |
| Nordheim, Hamm et al. 2015 [99]                                        |                                              | Case study (n=14)                                                                | Inpatient long-term care       | Person in need of care (dementia)<br><br>Organisation   | +            | Positive effects on cognitive abilities; small positive effects on well-being; positive effect on neuropsychiatric symptoms; also, some negative developments during study period (small negative effect on Barthel-Index, mental status, agitation)<br>Positive effect on communication with caregivers, easier access to patients | 4                 |
| Subramaniam and Woods 2016 [166]                                       | Digital life story books                     | Case study (n=6)                                                                 | Inpatient long-term care       | Person in need of care (dementia)<br>Informal Caregiver | +/-          | Positive effect on QoL, negative effect on geriatric depression score, positive effect on autobiographic memory<br>Positive effect on quality of relationship between informal caregiver and patient                                                                                                                                | 4                 |
| Portela, Correia et al. 2011 [101]                                     | Serious Games (Wii)                          | Quasi-Experiment (3-armed, i: n=20, c1: n=23, c2: n=22)                          | Inpatient long-term care       | Person in need of care                                  | +/-          | Positive effects on physical functioning and vitality, negative effect on emotional performance                                                                                                                                                                                                                                     | 2                 |

| Authors/Year                                                    | Technology sub-category / Specific technology            | Study type & size                                                                                                                   | Target Setting            | Target group for effect                                 | +, -, o, +/- | Effect                                                                                                                                                                                                                                                                       | Level of Evidence |
|-----------------------------------------------------------------|----------------------------------------------------------|-------------------------------------------------------------------------------------------------------------------------------------|---------------------------|---------------------------------------------------------|--------------|------------------------------------------------------------------------------------------------------------------------------------------------------------------------------------------------------------------------------------------------------------------------------|-------------------|
| Chen, Huang et al. 2012 [100]                                   | Serious Games (Xbox Kinect)                              | Quasi-Experiment (i: n=22, c: n=39)                                                                                                 | Inpatient long-term care  | Person in need of care                                  | +            | Positive effects on general health, physical functioning, role physical, body pain, social functioning                                                                                                                                                                       | 2                 |
| <b>1.7. Studies on Process Planning/Work Process Management</b> |                                                          |                                                                                                                                     |                           |                                                         |              |                                                                                                                                                                                                                                                                              |                   |
| Pare, Sicotte et al. 2011 [24]                                  | Software for planning and optimizing nursing processes   | Mixed methods (qualitative interviews: n=57, survey: n=101, document analysis: pre: n=77, post: n=73, patient-questionnaire: n=223) | Outpatient long-term care | Person in need of care<br>Organisation                  | +            | Positive effect on patient education<br>Positive effects on completeness and quality of nursing notes, quality of care, assessment of patient's condition (all perceived by caregivers), positive effect on understanding the patient (perceived by caregivers and patients) | 4                 |
| Valerie, Choy et al. 2016 [95]                                  | Intelligent performance assessment system                | Case study (n=1 home care service)                                                                                                  | Outpatient long-term care | Person in need of care<br>Organisation                  | +            | Positive effect on patient satisfaction<br>Positive effects on quality of care and complaints per week                                                                                                                                                                       | 4                 |
| <b>1.8. Studies on Target Group Specific Interfaces</b>         |                                                          |                                                                                                                                     |                           |                                                         |              |                                                                                                                                                                                                                                                                              |                   |
| Olchanski, Dziadzko et al. 2017 [108]                           | Electronic Medical Record Interface for ICU-use          | Quasi-Experiment (pre/post-design, pre: n=983, post: n=856)                                                                         | ICU                       | Person in need of care                                  | +            | Reduced overall and ICU mortality, reduced length of stay, reduced costs of hospitalisation                                                                                                                                                                                  | 2                 |
| Lazar, Demiris et al. 2016 [110]                                | Interface for people with memory impairment/dementia     | Qualitative (n=16)                                                                                                                  | Inpatient long-term care  | Person in need of care (dementia)<br>Informal Caregiver | +            | Qualitatively described positive effects (i.e. enjoyment, mental stimulation)<br>Facilitated interactions with informal caregiver                                                                                                                                            | 4                 |
| Schall, Cullen et al. 2017 [109]                                | Dashboard design within an electronic health record      | User study. (n=7)                                                                                                                   | Hospital                  | Organisation                                            | +            | Positive effects on task completion time and task accuracy                                                                                                                                                                                                                   | 4                 |
| <b>2. Studies on Robotic Technologies</b>                       |                                                          |                                                                                                                                     |                           |                                                         |              |                                                                                                                                                                                                                                                                              |                   |
| Ranasinghe, Dantanarayana et al. 2014 [17]                      | Physical assistance (robotic lifting device)             | User study. (n=60)                                                                                                                  | Inpatient long-term care  | Formal caregiver                                        | +            | Reduced force required to handle robotic device compared to a standard hoist                                                                                                                                                                                                 | 4                 |
| Wang, Gorski et al. 2011 [124]                                  | Physical assistance (robotic wheelchair)                 | User study. (n=6)                                                                                                                   | Inpatient long-term care  | Person in need of care (with cognitive limitations)     | -/+          | Positive effect on mobility and independent distance travelled, but technological reliability not sufficient for safe usage                                                                                                                                                  | 4                 |
| Summerfield, Seagull et al. 2011 [123]                          | Physical assistance/ Transport (pharmacy delivery robot) | Case study (n=3 pharmacies)                                                                                                         | Hospital/ICU              | Organisation                                            | +            | Decreases in time from fax to label, time for order preparation and idle time for medications to be delivered, increased satisfaction of nurses with pharmacy                                                                                                                | 4                 |
| Broadbent, Orejana et al. 2015 [121]                            | Social/service robot (Cafero)                            | Quasi-Experiment (i: n=85, c: n=48)                                                                                                 | Hospital                  | Organisation                                            | +            | Reduced consultation length (robot measures vital signs prior to consultation)                                                                                                                                                                                               | 2                 |
| Bettinelli, Lei et al. 2015 [122]                               | Social/telepresence robot                                | Quasi-Experiment (20 nurses performing 68 robot rounds vs. 78 telephone rounds)                                                     | ICU                       | Formal Caregiver                                        | o            | Not statistically significant positive effect on Collaboration and Satisfaction about Care Decision (CSACD) Scores of Caregivers                                                                                                                                             | 2                 |

| Authors/Year                            | Technology sub-category / Specific technology    | Study type & size                                                               | Target Setting                      | Target group for effect                        | +, -, o, +/-                                        | Effect                                                                                                                                                                                                           | Level of Evidence |
|-----------------------------------------|--------------------------------------------------|---------------------------------------------------------------------------------|-------------------------------------|------------------------------------------------|-----------------------------------------------------|------------------------------------------------------------------------------------------------------------------------------------------------------------------------------------------------------------------|-------------------|
| Broadbent, Kerse et al. 2016 [18]       | Socially interactive robot (Guide robot, Cafero) | Quasi-Experiment (i: n=29 staff, n=27 residents; c: n=24 staff, n=25 residents) | Inpatient long-term care / Hospital | Person in need of care<br>Formal caregiver     | o<br>o                                              | No significant effects on depression score, QoL, mobility, activities of daily living, behavioural scores<br>No significant effects on QoL and Job morale (positive effect on job satisfaction of control group) | 2                 |
| Gustafsson, Svanberg et al. 2015 [114]  | Social/therapeutic robot (JustoCat)              | Case study (n=4 patients); interviews (n=14 relatives/prof. caregiver)          | Inpatient long-term care            | Person in need of care (dementia)              | +                                                   | Positive effects on interaction, communication, relaxation based on qualitative statements of caregivers                                                                                                         | 4                 |
| Baisch, Kolling et al. 2018 [117]       | Social/therapeutic robot (Paro, Pleo)            | Qualitative (n=73 interviews)                                                   | Inpatient long-term care            | Person in need of care                         | +                                                   | Positive short-term psycho-social effects based on qualitative statements                                                                                                                                        | 4                 |
| Moyle, Jones et al. 2017 [120]          | Social/therapeutic robot (Paro)                  | RCT (i: n=138, c1: n=140, c2: n=137)                                            | Inpatient long-term care            | Person in need of care (dementia)              | o/+                                                 | Positive effects in Paro group on verbal and visual engagement and agitation (based on observational data), no effects on Cohens-Mansfield Agitation Inventory-Short Form                                        | 1b                |
| Petersen, Houston et al. 2017 [119]     |                                                  | RCT (i: n=35, c: n=26)                                                          | Inpatient long-term care            | Person in need of care                         | +                                                   | Positive effects on Rating of Anxiety in Dementia scale, Cornell Scale for Depression in Dementia, Skin response, pulse oximetry, pulse rate, reduced pain and psychoactive medication                           | 1b                |
| Robinson, MacDonald et al. 2013 [11]    |                                                  | RCT (i: n=20, c: n=20)                                                          | Inpatient long-term care            | Person in need of care                         | +                                                   | Positive effect on loneliness, no effect on depression, no effect on QoL                                                                                                                                         | 1b                |
| Jøranson, Pedersen et al. 2015 [118]    |                                                  | RCT (i: n=27, c: n=26)                                                          | Inpatient long-term care            | Person in need of care (dementia)              | +                                                   | Positive effects on Brief Agitation Rating Scale (BARS), brief version of Cornell Scale for Symptoms of Depressions and Dementia (CSDD) Scores                                                                   | 1b                |
| Jøranson, Pedersen et al. 2016 [12]     |                                                  | RCT (i: n=27, c: n=26)                                                          | Inpatient long-term care            | Person in need of care (dementia)              | +                                                   | Positive effects on Quality of Life in Late Dementia (QUALID) scores and medication for subgroup with severe dementia                                                                                            | 1b                |
| Bemelmans, Gelderblom et al. 2015 [167] |                                                  | Quasi-Experiment (pre/post-design n=71)                                         | Inpatient long-term care            | Person in need of care (dementia)<br>Caregiver | +                                                   | Positive effect on Individually Prioritized Problems Assessment (IPPA), mood<br>No significant effect on facilitation of care                                                                                    | 2                 |
| Liang, Piroth et al. 2017 [168]         |                                                  | Pilot-RCT (t1 i: n=14, c=13; t2: i: n=13, c: n=11)                              | Day care/home                       | Person in need of care (dementia)              | +                                                   | Positive effects on facial expressions (smiling), communication with staff for day care group                                                                                                                    | 2                 |
| Moyle, Cooke et al. 2013 [169]          |                                                  | Pilot-RCT (i: n=9, c: n=9)                                                      | Inpatient long-term care            | Person in need of care (dementia)              | +                                                   | Positive effects on QoL in Alzheimer's Disease scale, Rating Anxiety in Dementia Scale and some sub-dimensions of Observed Emotion Rating Scale                                                                  | 2                 |
| Bennett, Grasso et al. 2015 [170]       | Case Study (n=8)                                 | home                                                                            | Person in need of care              | +                                              | Positive effect on depressive symptom scores (PHQ9) | 4                                                                                                                                                                                                                |                   |



| Authors/Year                              | Technology sub-category / Specific technology                             | Study type & size                                                                                                                                    | Target Setting                      | Target group for effect                                 | +, -, o, +/- | Effect                                                                                                                                                                                                                                                                                                                                                                                                                     | Level of Evidence |
|-------------------------------------------|---------------------------------------------------------------------------|------------------------------------------------------------------------------------------------------------------------------------------------------|-------------------------------------|---------------------------------------------------------|--------------|----------------------------------------------------------------------------------------------------------------------------------------------------------------------------------------------------------------------------------------------------------------------------------------------------------------------------------------------------------------------------------------------------------------------------|-------------------|
| Birks, Bodak et al. 2016 [171]            | Social/therapeutic robot (Paro)                                           | Qualitative (n=3)                                                                                                                                    | Inpatient long-term care            | Person in need of care<br>Formal and informal Caregiver | +            | Positive effects on emotional state and challenging behaviours (perceived by caregivers)<br>Facilitation of social interactions with patients                                                                                                                                                                                                                                                                              | 4                 |
| Šabanović, Bennett et al. 2013 [172]      |                                                                           | Qualitative (n=7)                                                                                                                                    | Inpatient long-term care            | Person in need of care (dementia)                       | +            | Positive effects on interaction with other people, attention and activity                                                                                                                                                                                                                                                                                                                                                  | 4                 |
| Wagemaker, Dekkers et al. 2017 [173]      |                                                                           | Case study (n=5)                                                                                                                                     | Inpatient long-term care            | Person in need of care (dementia)                       | o            | No effects on alertness and mood (positive effects on mood and alertness for 1 of 5 subjects)                                                                                                                                                                                                                                                                                                                              | 4                 |
| Iacono and Marti 2016 [174]               |                                                                           | User study. (n=6)                                                                                                                                    | Inpatient long-term care            | Person in need of care (dementia)                       | +            | Positive effects on narrative activity, quality of life in terms of relaxing, socializing, smiling, participating (perceived by caregivers after sessions)                                                                                                                                                                                                                                                                 | 4                 |
| Wada, Takasawa et al. 2014 [175]          |                                                                           | User study. (n=64)                                                                                                                                   | Inpatient long-term care            | Person in need of care                                  | +            | Positive effects on 25 of the inhabitants (reduced anxiety and irritation and depression, increase in speech); few negative cases described (7 disliked Paro, 1 neg. reaction)                                                                                                                                                                                                                                             | 4                 |
| Valenti, Aguera-Ortiz et al. 2015 [116]   | Social/therapeutic robot (Paro) / humanoid socially assistive robot (NAO) | Pilot RCT, Nursing home: 3-armed, Phase 1: i1: n=22, i2: n=30, c: n=38; Phase 2: i1: n=42, i2: n=36, c: n=32, Day Care Center: pre/post design: n=37 | Inpatient long-term care / Day care | Person in need of care (dementia)                       | +/-          | Selective outcomes: positive effects on apathy for Paro- and NAO-group, positive effects on QoL-in-late stage-dementia-Score, negative effects on irritability for both groups, negative effects on delusions for NAO-group. Decrease in quality of life for Paro-group compared to conventional therapy, In Day care: positive effects on irritability and neuro-psychiatric symptoms of Nao-group compared to Paro-group | 2                 |
| Shukla, Barreda-Ángeles et al. 2017 [115] | Social/therapeutic robot: humanoid socially assistive robot (NAO)         | Case study (n=5)                                                                                                                                     | undefined                           | Formal caregiver                                        | +            | Positive effect on subjective workload, no effect on time spent on patient attention                                                                                                                                                                                                                                                                                                                                       | 4                 |
| <b>3. Studies on Sensors / Monitoring</b> |                                                                           |                                                                                                                                                      |                                     |                                                         |              |                                                                                                                                                                                                                                                                                                                                                                                                                            |                   |
| van der Lende, Cox et al. 2016 [131]      | Behaviour Analysis / Emergency detection                                  | Quasi-Experiment (pre/post-design n=41)                                                                                                              | Inpatient long-term care            | Organisation                                            | +            | Positive effect on detecting seizures (but not considered cost-effective)                                                                                                                                                                                                                                                                                                                                                  | 2                 |
| Hardin, Dienemann et al. 2013 [130]       | Behaviour Analysis / fall prevention                                      | RCT (i: n=5, c: n=5 medical surgical units)                                                                                                          | Hospital                            | Person in need of care                                  | o            | No significant difference in fall rate per 1.000 patient days (primary outcome), but positive effect in fall rate per 1.000 admissions                                                                                                                                                                                                                                                                                     | 1b                |
| Sahota, Drummond et al. 2014 [127]        |                                                                           | RCT (i: n=918, c: n=921)                                                                                                                             | Hospital                            | Person in need of care                                  | o            | No significant effect on fall incidence; no difference for time to first bedside fall, positive trend to early bedside falls risk (not significant)                                                                                                                                                                                                                                                                        | 1b                |
| Shee, Phillips et al. 2014 [128]          |                                                                           | Quasi-Experiment (pre/post-design t1: n=34, t2: n=34, t3: n=19)                                                                                      | Hospital                            | Person in need of care (dementia)                       | +            | Positive effect on fall rates (but maybe caused by other reasons due to study limitations)                                                                                                                                                                                                                                                                                                                                 | 2                 |
| Tchalla, Lachal et al. 2013 [129]         |                                                                           | Quasi-Experiment (i: n=49, c: n=47)                                                                                                                  | Home                                | Person in need of care (dementia)                       | +            | Reduced number of falls in intervention group                                                                                                                                                                                                                                                                                                                                                                              | 2                 |

| Authors/Year                             | Technology sub-category / Specific technology  | Study type & size                                                         | Target Setting            | Target group for effect                      | +, -, o, +/- | Effect                                                                                                                                                                                                           | Level of Evidence |
|------------------------------------------|------------------------------------------------|---------------------------------------------------------------------------|---------------------------|----------------------------------------------|--------------|------------------------------------------------------------------------------------------------------------------------------------------------------------------------------------------------------------------|-------------------|
| Pickham, Berte et al. 2018 [125]         | Behaviour Analysis / pressure ulcer prevention | RCT (i: n=659, c: n=653)                                                  | ICU                       | Person in need of care<br>Formal caregiver   | +            | Reduced number of hospital-acquired pressure injuries, secondary outcome: increase in total time with turning compliance according to guidelines                                                                 | 1b                |
| Marra, Sampaio Camargo et al. 2014 [126] | Behaviour Analysis of Carers/Hand hygiene      | Quasi-Experiment (i: n=1 unit, c: n=1 unit)                               | Hospital                  | Formal caregiver                             | +            | Increase in dispensing episodes per patient day, increased handrub consumption                                                                                                                                   | 2                 |
| Jousselme, Vialet et al. 2011 [139]      | External risk detection /noise sensor          | Quasi-Experiment (pre/post-design n=1 care unit)                          | ICU                       | Formal caregiver                             | +            | Reduction in noise level when device was present (no difference if device turned on or off)                                                                                                                      | 2                 |
| Lexis 2013 [132]                         | General Behaviour Analysis/ Decision support   | Quasi-Experiment (pre/post-design n=19 clients, n=16 informal caregivers) | Outpatient long-term care | Informal caregiver<br>Person in need of care | +            | Informal caregiver: decrease of time spent on patient, decreased subjective burden<br>Care recipient: no statistically significant changes                                                                       | 2                 |
| Rantz, Phillips et al. 2017 [133]        |                                                | RCT (i: n=86, c: n=85)                                                    | Inpatient long-term care  | Person in need of care                       | +            | Positive effect on walking speed, step distance and risk of falling, no differences in health care costs                                                                                                         | 1b                |
| Lazarou, Karakostas et al. 2016 [134]    |                                                | User study. (n=4)                                                         | Home                      | Person in need of care (dementia)            | +            | Positive improvements in several test scales (20 different scales were used), positive improvement in sleep patterns, reduced anxiety                                                                            | 4                 |
| Pot, Willemse et al. 2012 [140]          | Tracking /GPS-Device                           | Quasi-Experiment (pre/post-design n=28)                                   | Home                      | Informal caregiver (dementia)                | +            | Positive effect on worrying (small), positive effect on letting the patients go outside alone, no effect on Self-Perceived Pressure from Informal Care scale                                                     | 2                 |
| Osaimi, Kadi et al. 2017 [141]           | Tracking/RFID-Identification                   | Case study (n=190)                                                        | Hospital                  | Organisation                                 | +/-          | Positive effect on identifying infants, ambivalent effect on workflow (both perceived by caregivers)                                                                                                             | 4a                |
| Brown, Terrence et al. 2014 [135]        | Vital sign monitoring (patient)                | Quasi-Experiment (i: n=2314, c: n=5329)                                   | Hospital                  | Person in need of care<br>Organisation       | +            | Positive effect on average length of stay in ICU, positive effect on total ICU days for transfers per 1.000 patients in the medical-surgical unit,<br>No effect on number of transfers from surgical unit to ICU | 2                 |
| Zhou, Liu et al. 2012 [136]              |                                                | Case Studie (n=14)                                                        | Home                      | Informal caregiver                           | +            | Time savings due to reduced number of hospital visits                                                                                                                                                            | 4                 |
| Kuroda, Noma et al. 2013 [137]           |                                                | User study. (n=24)                                                        | Hospital                  | Organisation                                 | +/-          | Reduction of time for input of vital sign measurements in hospital information system, higher efficiency (perceived by nurses), but technical error rate is too high for clinical use                            | 4                 |
| Pigini, Bovi et al. 2017 [138]           |                                                | User study. (n1=15, n2=17, n3=3)                                          | Home                      | Person in need of care                       | +            | Positive effects on health status monitoring (remembering measurements), safety at home (self-perceived), reduced stress compared to day hospital visit (self-perceived)                                         | 4                 |

| Authors/Year                                           | Technology sub-category / Specific technology                  | Study type & size                                       | Target Setting            | Target group for effect                                 | +, -, o, +/- | Effect                                                                                                                                                                                     | Level of Evidence |
|--------------------------------------------------------|----------------------------------------------------------------|---------------------------------------------------------|---------------------------|---------------------------------------------------------|--------------|--------------------------------------------------------------------------------------------------------------------------------------------------------------------------------------------|-------------------|
| <b>4. Studies on Assistive Devices</b>                 |                                                                |                                                         |                           |                                                         |              |                                                                                                                                                                                            |                   |
| Miller, Rodger et al. 2011 [149]                       | Care support (multi-modal distraction)                         | RCT (i: n=20, c: n=20)                                  | Hospital                  | Child in need of care<br>Organisation                   | +<br>+       | Less pain reported by children, pain reduction reported by parents, reduced stress levels reported by nurses, reduced pulse rates, reduced healing time<br>Reduced treatment time          | 1b                |
| Orto, Hendrix et al. 2015 [148]                        | Care support with treatment focus (smart pumps)                | Quasi-Experiment (pre/post-design n=approx. 600 nurses) | Hospital                  | Person in need of care                                  | +            | Positive effect on adverse drug events                                                                                                                                                     | 2                 |
| Vadie, Shuman et al. 2017 [147]                        |                                                                | Cross-Sectional (n=5 hospitals)                         | Hospital                  | Formal Caregiver                                        | +            | Positive effects on effective alerts, dosing errors and proportional doses                                                                                                                 | 4                 |
| Zimmermann, Zeilfelder et al. 2017 [150]               | Care support for Activities of Daily Living (Drink monitoring) | User study. (n=15)                                      | Inpatient long-term care  | Person in need of care                                  | +            | Increased drinking amount and frequency                                                                                                                                                    | 4                 |
| Marek, Stetzer et al. 2013 [144]                       | Reminder System (medication dispenser)                         | RCT (3-armed, i1: n=98, i2: n=102, c: n=101)            | Outpatient long-term care | Person in need of care                                  | o            | No additional benefit by medication dispenser                                                                                                                                              | 1b                |
| Akiyama and Sasaki 2013 [145]                          |                                                                | Case study (n=17 people in 10 homes)                    | Outpatient long-term care | Person in need of care<br>Formal Caregiver              | +/-          | 40% of care recipient says "frequency of forgetting medicine is reduced"<br>increased workload in medication support                                                                       | 4                 |
| Suzuki, Yokoishi et al. 2011 [146]                     |                                                                | User study. (n=3)                                       | Home                      | Person in need of care                                  | +            | Positive effect on missed medication rate                                                                                                                                                  | 4                 |
| <b>5. Studies on Ambient Assisted Living Solutions</b> |                                                                |                                                         |                           |                                                         |              |                                                                                                                                                                                            |                   |
| Hattink, Meiland et al. 2016 [15]                      | AAL at home                                                    | Quasi-Experiment (i: n=11, c: n=13)                     | Home                      | Person in need of care (dementia)<br>Informal Caregiver | o            | No significant differences (perceived autonomy, care needs, QoL, performance of daily activities), no effect on sense of competence for informal caregivers                                | 2                 |
| Nijhof, van Gemert-Pijnen et al. 2013 [16]             |                                                                | Qualitative (n=14)                                      | Home                      | Person in need of care (dementia)<br>Informal caregiver | +<br>+       | Positive effect on sense of safety and security for care (perceived by caregiver)<br>Positive effect on anxieties and concerns (self-perceived), increased time for restorative activities | 4                 |
| Trukeschitz B. 2018 [14]                               | AAL at home incl. formal care                                  | Quasi-Experiment (i: n=59, c: n=59)                     | Outpatient long-term care | Person in need of care                                  | +            | Positive effect on personal safety (small), no effect on QoL, no effect on independency                                                                                                    | 2                 |
| <b>6. Studies on Virtual Reality</b>                   |                                                                |                                                         |                           |                                                         |              |                                                                                                                                                                                            |                   |
| Kipping, Rodger et al. 2012 [152]                      | Virtual Reality for distraction/pain reduction                 | RCT (i: n=20, c=21)                                     | Hospital                  | Person in need of care                                  | +            | Positive effect on pain scale during dressing removal, less medication needed, no differences in treatment times                                                                           | 1b                |
| Mazzacano, McSherry et al. 2016 [153]                  |                                                                | Quasi-Experiment (pre/post-design n=18)                 | Hospital                  | Person in need of care                                  | +            | Lower number of "breakthrough pain events during dressing changes, less medication needed, no differences in pain and anxiety                                                              | 2                 |
| Patterson, Soltani et al. 2012 [154]                   |                                                                | RCT (3-armed, i1: n=23, i2: n=15, c: n=17)              | Hospital                  | Person in need of care                                  | o            | No statistically differences in pain reduction                                                                                                                                             | 1b                |

Abbreviations: i=intervention; c=control; t1=time point 1; t2=time point 2; +=positive effect; -=negative effect; o=neutral effect; +/- =ambivalent effects

## References

(Numbering refers to main text and table)

11. Robinson H, MacDonald B, Kerse N, Broadbent E: The Psychosocial Effects of a Companion Robot: A Randomized Controlled Trial. *Journal of the American Medical Directors Association* 2013, 14(9):661-667.
12. Jøranson N, Pedersen I, Rokstad AMM, Ihlebæk C: Change in quality of life in older people with dementia participating in Paro-activity: a cluster-randomized controlled trial. *Journal of Advanced Nursing* 2016, 72(12):3020-3033. doi:10.1111/jan.13076
14. Trukeschitz B, Schneider C, Ring-Dimitriou S: Smartes Betreutes Wohnen: Nutzung, Systemakzeptanz und Wirkungen von „meinZentraAL“ [Smart assisted living: usage, system acceptance and effects of "myCentraAL"], BoD Books on Demand: Norderstedt; 2018.
15. Hattink BJJ, Meiland FJM, Overmars-Marx T, de Boer M, Ebben PWG, van Blanken M, Verhaeghe S, Stalpers-Croeze I, Jedlitschka A, Flick SE et al: The electronic, personalizable Rosetta system for dementia care: exploring the user-friendliness, usefulness and impact. *Disability & Rehabilitation: Assistive Technology* 2016, 11(1):61-71.
16. Nijhof N, van Gemert-Pijnen LJ, Woolrych R, Sixsmith A: An evaluation of preventive sensor technology for dementia care. *Journal of Telemedicine and Telecare* 2013, 19(2):95-100.
17. Ranasinghe R, Dantanarayana L, Tran A, Lie S, Behrens M, Liu L: Smart hoist: An assistive robot to aid carers. In: 2014 13th International Conference on Control Automation Robotics & Vision (ICARCV): 10-12 Dec. 2014 2014; 2014: 1285-1291.
18. Broadbent E, Kerse N, Peri K, Robinson H, Jayawardena C, Kuo T, Datta C, Stafford R, Butler H, Jawalkar P et al: Benefits and problems of health-care robots in aged care settings: A comparison trial. *Australas J Ageing* 2016, 35(1):23-29.
24. Pare G, Sicotte C, Moreault MP, Poba-Nzaou P, Templier M, Nahas G: Effects of Mobile Computing on the Quality of Homecare Nursing Practice. In: 2011 44th Hawaii International Conference on System Sciences: 4-7 Jan. 2011 2011; 2011: 1-11.
27. Appari A, Johnson EM, Anthony DL: Information technology and hospital patient safety: a cross-sectional study of US acute care hospitals. *The American journal of managed care* 2014, 20(17):eSP39-eSP47.
28. Yeaman B, Ko KJ, Castillo RAd: Care Transitions in Long-term Care and Acute Care: Health Information Exchange and Readmission Rates. *Online Journal of Issues in Nursing* 2015, 20(3):1-1.
29. Meyer-Delpho C, Schubert HJ: Potential of Information and Communications Technology to Improve Intersectoral Processes of Care: A Case Study of the Specialised Outpatient Palliative Care. *Gesundheitswesen* 2014, 77(8-9):550-556.
35. Restuccia JD, Cohen AB, Horwitt JN, Shwartz M: Hospital implementation of health information technology and quality of care: Are they related? *BMC Medical Informatics and Decision Making* 2012, 12(1).
36. McKenna RM, Dwyer D, Rizzo JA: Is HIT a hit? The impact of health information technology on inpatient hospital outcomes. *Applied Economics* 2017:1-13.
37. Angst CM, Devaraj S, D'Arcy J: Dual role of IT-assisted communication in patient care: A validated structure-process-outcome framework. *Journal of Management Information Systems* 2012, 29(2):257-292.
38. Alexander GL, Pasupathy KS, Steege LM, Strecker EB, Carley KM: Multi-disciplinary communication networks for skin risk assessment in nursing homes with high IT sophistication. *International Journal of Medical Informatics* 2014, 83(8):581-591.
39. Alexander GL, Steege LM, Pasupathy KS, Wise K: Case studies of IT sophistication in nursing homes: A mixed method approach to examine communication strategies about pressure ulcer prevention practices. *International Journal of Industrial Ergonomics* 2015, 49:156-166.
40. Munyisia EN, Yu P, Hailey D: The impact of an electronic nursing documentation system on efficiency of documentation by caregivers in a residential aged care facility. *Journal of Clinical Nursing* 2012, 21(19/20):2940-2948.
41. Steurbaut K, Colpaert K, Van Hoecke S, Steurbaut S, Danneels C, Decruyenaere J, De Turck F: Design and evaluation of a service oriented architecture for paperless ICU tariffication. *Journal of Medical Systems* 2012, 36(3):1403-1416.
42. Patmon FL, Gee PM, Rylee TL, Readdy NL: Using Interactive Patient Engagement Technology in Clinical Practice: A Qualitative Assessment of Nurses' Perceptions. *J Med Internet Res* 2016, 18(11):e298.
43. Mitchell S, Yaylacicegi U: EHR prescription for small, medium, and large hospitals: an exploratory study of Texas acute care hospitals. *International journal of electronic healthcare* 2012, 7(2):125-140.

44. Bradley SL: A phenomenological exploration of nurses' perceptions of the effect of electronic documentation on healing relationships. University of Phoenix; 2011.
45. Takian A, Sheikh A, Barber N: We are bitter, but we are better off: Case study of the implementation of an electronic health record system into a mental health hospital in England. *BMC Health Services Research* 2012, 12(1).
46. Yusof MM: A case study evaluation of a Critical Care Information System adoption using the socio-technical and fit approach. *International Journal of Medical Informatics* 2015, 84(7):486-499.
47. Seibert HH, Maddox RR, Flynn EA, Williams CK: Effect of barcode technology with electronic medication administration record on medication accuracy rates. *American Journal of Health-System Pharmacy* 2014, 71(3):209-218.
48. Appari A, Carian EK, Johnson ME, Anthony DL: Medication administration quality and health information technology: a national study of US hospitals. *Journal of the American Medical Informatics Association* 2012, 19(3):360-367.
49. Chanyagorn P, Kungwannarongkun B, Chanyagorn W: Design of electronic nursing Kardex system for medication error prevention in IPD patients. In: 2016 6th IEEE International Conference on Control System, Computing and Engineering (ICCSCE): 25-27 Nov. 2016 2016; 2016: 279-285.
50. Ching JM, Williams BL, Idemoto LM, Blackmore CC: Using Lean 'Automation with a Human Touch' to Improve Medication Safety: A Step Closer to the 'Perfect Dose'. *Joint Commission Journal on Quality & Patient Safety* 2014, 40(8):341-350.
51. Huang H-Y, Lee T-T: Impact of bar-code medication administration on nursing activity patterns and usage experience in Taiwan. *CIN: Computers, Informatics, Nursing* 2011, 29(10):554-563.
52. Oakley B, Hunter JB: Implementing an electronic patient handover system. *British Journal of Hospital Medicine (17508460)* 2017, 78(1):16-19.
53. Clarke CN, Patel SH, Day RW, George S, Sweeney C, Monetes De Oca GA, Aiss MA, Grubbs EG, Bednarski BK, Lee JE et al: Implementation of a standardized electronic tool improves compliance, accuracy, and efficiency of trainee-to-trainee patient care handoffs after complex general surgical oncology procedures. *Surgery (United States)* 2017, 161(3):869-875.
54. Lear CL, Walters C: Use of Electronic Nurse Reminders to Improve Documentation. *CIN: Computers, Informatics, Nursing* 2015, 33(12):523-529.
55. Paranilam SO: Effectiveness of an Electronic Pain Notification System on Postoperative Pain. University of Maryland, Baltimore; 2013.
56. Hitt LM, Tambe P: Health care information technology, work organization, and nursing home performance. *Industrial and Labor Relations Review* 2016, 69(4):834-859.
57. Meehan R: Electronic Health Records in Long-Term Care: Staff Perspectives. *Journal of Applied Gerontology* 2017, 36(10):1175-1196.
58. Rantz MJ, Alexander G, Galambos C, Flesner MK, Vogelsmeier A, Hicks L, Scott-Cawiezell J, Zwygart-Stauffacher M, Greenwald L: The use of bedside electronic medical record to improve quality of care in nursing facilities: a qualitative analysis. *CIN: Computers, Informatics, Nursing* 2011, 29(3):149-156.
59. McKibbin KA, Lokker C, Handler SM, Dolovich LR, Holbrook AM, O'Reilly D, Tamblyn R, B JH, Basu R, Troyan S et al: Enabling medication management through health information technology (Health IT). *Evid Rep Technol Assess (Full Rep)* 2011(201):1-951.
62. Lapane KL, Hughes CM, Daiello LA, Cameron KA, Feinberg J: Effect of a Pharmacist-Led Multicomponent Intervention Focusing on the Medication Monitoring Phase to Prevent Potential Adverse Drug Events in Nursing Homes. *Journal of the American Geriatrics Society* 2011, 59(7):1238-1245.
63. Dykes PC, I-Ching EH, Soukup JR, Chang F, Lipsitz S: A case control study to improve accuracy of an electronic fall prevention toolkit. *AMIA Annual Symposium proceedings / AMIA Symposium AMIA Symposium* 2012, 2012:170-179.
64. Lang RLN: Evaluating the Effectiveness of Nurse-Focused Computerized Clinical Decision Support on Urinary Catheter Practice Guidelines. Gardner-Webb University; 2012.
65. Salinas J, Chung KK, Mann EA, Cancio LC, Kramer GC, Serio-Melvin ML, Renz EM, Wade CE, Wolf SE: Computerized decision support system improves fluid resuscitation following severe burns: An original study. *Critical Care Medicine* 2011, 39(9):2031-2038.
69. Bowles KH, Hanlon AL, Glick HA, Naylor MD, O'Connor M, Riegel B, Shih NW, Weiner MG: Clinical effectiveness, access to, and satisfaction with care using a telehomecare substitution intervention: a randomized controlled trial. *International journal of telemedicine and applications* 2011, 2011:540138.
70. Paré G, Poba-Nzaou P, Sicotte C: Home telemonitoring for chronic disease management: An economic assessment. *International Journal of Technology Assessment in Health Care* 2013, 29(2):155-161.
71. Göransson C, Eriksson I, Ziegert K, Wengström Y, Langius-Eklöf A, Brovall M, Kihlgren A, Blomberg K: Testing an app for reporting health concerns-Experiences from older people and home care nurses. *International Journal of Older People Nursing* 2017, 13(e12181).

72. Cady RG, Finkelstein SM: Task-technology fit of video telehealth for nurses in an outpatient clinic setting. *Telemedicine journal and e-health : the official journal of the American Telemedicine Association* 2014, 20(7):633-639.
73. Steventon A, Bardsley M, Billings J, Dixon J, Doll H, Beynon M, Hirani S, Cartwright M, Rixon L, Knapp M et al: Effect of telecare on use of health and social care services: findings from the Whole Systems Demonstrator cluster randomised trial. *Age Ageing* 2013, 42(4):501-508.
74. Wakefield BJ, Vaughan-Sarrazin M: Home Telehealth and Caregiving Appraisal in Chronic Illness. *Telemedicine and e-Health* 2017, 23(4):282-289.
75. van der Heide LA, Willems CG, Spreeuwenberg MD, Rietman J, de Witte LP: Implementation of CareTV in care for the elderly: The effects on feelings of loneliness and safety and future challenges. *Technology & Disability* 2012, 24(4):283-291.
76. Chiang KF, Wang HH: Nurses' experiences of using a smart mobile device application to assist home care for patients with chronic disease: A qualitative study. *Journal of Clinical Nursing* 2016, 25(13-14):2008-2017.
77. Hicken BL, Daniel C, Luptak M, Grant M, Kilian S, Rupper RW: Supporting Caregivers of Rural Veterans Electronically (SCORE). *Journal of Rural Health* 2017, 33(3):305-313.
78. Cady RG: *Measuring the Impact of Technology on Nurse Workflow: A Mixed Methods Approach*. University of Minnesota; 2012.
82. Chuang ST, Liu YF, Fu ZX, Liu KC, Chien SH, Lin CL, Lin PY: Application of a smartphone nurse call system for nursing care. *Telemedicine journal and e-health : the official journal of the American Telemedicine Association* 2015, 21(2):105-109.
83. Pemmassani V, Paget T, van Woerden HC, Pemmasani S: Hands-free communication to free up nursing time. *Nursing Times* 2014, 110(13):12-14.
84. Tielbur BR, Rice Cella DE, Currie A, Roach JD, Mattingly B, Boone J, Watwood C, McGauran A, Kirshner HS, Charles PD: Discharge huddle outfitted with mobile technology improves efficiency of transitioning stroke patients into follow-up care. *American Journal of Medical Quality* 2015, 30(1):36-44.
85. White C, McIlpatrick S, Dunwoody L, Watson M: Supporting and improving community health services-a prospective evaluation of ECHO technology in community palliative care nursing teams. *BMJ supportive & palliative care* 2015.
86. Blakey JD, Guy D, Simpson C, Fearn A, Cannaby S, Wilson P, Shaw D: Multimodal observational assessment of quality and productivity benefits from the implementation of wireless technology for out of hours working. *BMJ Open* 2012, 2(2).
87. Melby L, Brattheim BJ, Hellesø R: Patients in transition - improving hospital-home care collaboration through electronic messaging: providers' perspectives. *Journal of Clinical Nursing* 2015, 24(23/24):3389-3399.
88. Rodriguez CS: Enhancing the communication of suddenly speechless critical care patients. *American Journal of Critical Care* 2016, 25(3):e40-e47.
89. Wieck M, Blake B, Sellick C, Kenron D, DeVries D, Terry S, Krishnaswami S: Utilizing technology to improve intraoperative family communication. In: *American journal of surgery (no pagination)*, 2017. vol. Date of Publication: January 10; 2017.
90. Wu R, Rossos P, Quan S, Reeves S, Lo V, Wong B, Cheung M, Morra D: An evaluation of the use of smartphones to communicate between clinicians: A mixed-methods study. *Journal of Medical Internet Research* 2011, 13(3).
95. Valerie T, Choy KL, Siu PKY, Lam HY, Ho GTS, Cheng SWY: An intelligent performance assessment system for enhancing the service quality of home care nursing staff in the healthcare industry. In: *2016 Portland International Conference on Management of Engineering and Technology (PICMET)*: 4-8 Sept. 2016 2016; 2016: 576-584.
96. Zaccarelli C, Cirillo G, Passuti S, Annicchiarico R, Barban F: Computer-based cognitive intervention for dementia Sociable: motivating platform for elderly networking, mental reinforcement and social interaction. In: *2013 7th International Conference on Pervasive Computing Technologies for Healthcare and Workshops*: 5-8 May 2013 2013; 2013: 430-435.
97. Zhuang J, Fang R, Feng X, Xu X, Liu L, Bai Q, Tang H, Zhao Z, Chen S: The impact of human-computer interaction-based comprehensive training on the cognitive functions of cognitive impairment elderly individuals in a nursing home. In: *Journal of Alzheimer's disease*. vol. 36; 2013: 245-251.
98. Berenbaum R, Lange Y, Abramowitz L: Augmentative Alternative Communication for Alzheimer's Patients and Families? Using SAVION. In: *Proceedings of the 4th International Conference on Pervasive Technologies Related to Assistive Environments*: 2011; New York, NY, USA: ACM; 2011: 46-41.
99. Nordheim J, Hamm S, Kuhlmeier A, Suhr R: Tablet computers and their benefits for nursing home residents with dementia: Results of a qualitative pilot study. *Zeitschrift für Gerontologie und Geriatrie* 2015, 48(6):543-549.
100. Chen ST, Huang YGL, Chiang IT: Using Somatosensory Video Games to Promote Quality of Life for the Elderly with Disabilities. In: *2012 IEEE Fourth International Conference On Digital Game And Intelligent Toy Enhanced Learning*: 27-30 March 2012 2012; 2012: 258-262.

101. Portela FR, Correia RJC, Fonseca JA, Andrade JM: Wiithery on seniors - effects on physical and metal domains. In: 2011 IEEE 1st International Conference on Serious Games and Applications for Health (SeGAH): 16-18 Nov. 2011 2011; 2011: 1-5.
102. Mierlo L, Meiland F, Ven P, Hout H, Dröes R: Evaluation of DEM-DISC, customized e-advice on health and social support services for informal carers and case managers of people with dementia; a cluster randomized trial. In: International psychogeriatrics. vol. 27; 2015: 1365-1378.
103. Nijhof N, van Gemert-Pijnen JEWC, Burns CM, Seydel ER: A personal assistant for dementia to stay at home safe at reduced cost. *Gerontechnology* 2013, 11(3):469-479.
104. Webster G, Hanson VL: Technology for Supporting Care Staff in Residential Homes. *ACM Trans Access Comput* 2014, 5(3):8-1.
105. Yi-Sheng C, Hsin-Ju L, Yuan-Hsiang L: Using wireless measuring devices and Tablet PC to improve the efficiency of vital signs data collection in hospital. In: 2014 IEEE International Symposium on Bioelectronics and Bioinformatics (IEEE ISBB 2014): 11-14 April 2014 2014; 2014: 1-4.
106. Florczyk B, Scheurich A, Croghan J, Sheridan Jr P, Kurtz D, McGill W, McClain B: An observational study to assess an electronic point-of-care wound documentation and reporting system regarding user satisfaction and potential for improved care. *Ostomy Wound Management* 2012, 58(3):46-51.
107. Vowden K, Vowden P: A pilot study on the potential of remote support to enhance wound care for nursing-home patients. *Journal of wound care* 2013, 22(9):481-488.
108. Olchanski N, Dziadzko MA, Tiong IC, Daniels CE, Peters SG, O'Horo JC, Gong MN: Can a Novel ICU Data Display Positively Affect Patient Outcomes and Save Lives? *Journal of Medical Systems* 2017, 41(11):171.
109. Schall MC, Cullen L, Pennathur P, Chen H, Burrell K, Matthews G: Usability Evaluation and Implementation of a Health Information Technology Dashboard of Evidence-Based Quality Indicators. *CIN: Computers, Informatics, Nursing* 2017, 35(6):281-287.
110. Lazar A, Demiris G, Thompson HJ: Evaluation of a multifunctional technology system in a memory care unit: Opportunities for innovation in dementia care. *Informatics for Health & Social Care* 2016, 41(4):373-386.
114. Gustafsson C, Svanberg C, Müllersdorf M: Using a Robotic Cat in Dementia Care. *Journal of Gerontological Nursing* 2015, 41(10):46-56.
115. Shukla J, Barreda-Ángeles M, Oliver J, Puig D: Effectiveness of socially assistive robotics during cognitive stimulation interventions: Impact on caregivers. In: 2017 26th IEEE International Symposium on Robot and Human Interactive Communication (RO-MAN): Aug. 28 2017-Sept. 1 2017 2017; 2017: 62-67.
116. Valenti SM, Aguera-Ortiz L, Olazaran RJ, Mendoza RC, Perez MA, Rodriguez PI, Osa RE, Barrios SA, Herrero CV, Carrasco CL et al: Social robots in advanced dementia. In: *Frontiers in aging neuroscience*. vol. 7; 2015.
117. Baisch S, Kolling T, Rühl S, Klein B, Pantel J, Oswald F, Knopf M: Emotional robots in a nursing context: Empirical analysis of the present use and the effects of Paro and Pleo. *Zeitschrift für Gerontologie und Geriatrie* 2018, 51(1):16-24.
118. Jøranson N, Pedersen I, Rokstad AMM, Ihlebæk C: Effects on Symptoms of Agitation and Depression in Persons With Dementia Participating in Robot-Assisted Activity: A Cluster-Randomized Controlled Trial. *Journal of the American Medical Directors Association* 2015, 16(10):867-873.
119. Petersen S, Houston S, Qin H, Tague C, Studley J: The Utilization of Robotic Pets in Dementia Care. In: *Journal of alzheimer's disease*. vol. 55; 2017: 569-574.
120. Moyle W, Jones CJ, Murfield JE, Thalib L, Beattie ERA, Shum DKH, O'Dwyer ST, Mervin MC, Draper BM: Use of a Robotic Seal as a Therapeutic Tool to Improve Dementia Symptoms: A Cluster-Randomized Controlled Trial. *Journal of the American Medical Directors Association* 2017, 18(9):766-773.
121. Broadbent E, Orejana JR, Ahn HS, Xie J, Rouse P, MacDonald BA: The cost-effectiveness of a robot measuring vital signs in a rural medical practice. In: 2015 24th IEEE International Symposium on Robot and Human Interactive Communication (RO-MAN): Aug. 31 2015-Sept. 4 2015 2015; 2015: 577-581.
122. Bettinelli M, Lei Y, Beane M, Mackey C, Liesching T: Does Robotic Telerounding Enhance Nurse-Physician Collaboration Satisfaction About Care Decisions? In: *Telemedicine journal and e-health*. vol. 21; 2015: 637-643.
123. Summerfield MR, Seagull FJ, Vaidya N, Xiao Y: Use of pharmacy delivery robots in intensive care units. *American Journal of Health-System Pharmacy* 2011, 68(1):77-83.
124. Wang RH, Gorski SM, Holliday PJ, Fernie GR: Evaluation of a Contact Sensor Skirt for an Anti-Collision Power Wheelchair for Older Adult Nursing Home Residents With Dementia: Safety and Mobility. *Assistive Technology* 2011, 23(3):117-134.
125. Pickham D, Berte N, Pihulic M, Valdez A, Mayer B, Desai M: Effect of a wearable patient sensor on care delivery for preventing pressure injuries in acutely ill adults: A pragmatic randomized clinical trial (LS-HAPI study). *International Journal of Nursing Studies* 2018, 80:12-19.
126. Marra AR, Sampaio Camargo TZ, Magnus TP, Blaya RP, dos Santos GB, Guastelli LR, Rodrigues RD, Prado M, Victor EdS, Bogossian H et al: The use of real-time feedback via wireless technology to improve hand hygiene compliance. *American Journal of Infection Control* 2014, 42(6):608-611.

127. Sahota O, Drummond A, Kendrick D, Grainge MJ, Vass C, Sach T, Gladman J, Avis M: REFINE (REducing Falls in In-patieNt Elderly) using bed and bedside chair pressure sensors linked to radio-pagers in acute hospital care: a randomised controlled trial. *Age Ageing* 2014, 43(2):247-253.
128. Shee AW, Phillips B, Hill K, Dodd K: Feasibility, acceptability, and effectiveness of an electronic sensor bed/chair alarm in reducing falls in patients with cognitive impairment in a subacute ward. *Journal of Nursing Care Quality* 2014, 29(3):253-262.
129. Tchalla AE, Lachal F, Cardinaud N, Saulnier I, Rialle V, Preux P-M: Preventing and managing indoor falls with home-based technologies in mild and moderate Alzheimer's disease patients: pilot study in a community dwelling. In: *Dementia and geriatric cognitive disorders*. vol. 36; 2013: 251-261.
130. Hardin, Sr., Dienemann J, Rudisill P, Mills K: Inpatient fall prevention: use of in-room Webcams. In: *Journal of patient safety*. vol. 9; 2013: 29-35.
131. van der Lende M, Cox FME, Visser GH, Sander JW, Thijs RD: Value of video monitoring for nocturnal seizure detection in a residential setting. *Epilepsia* 2016, 57(11):1748-1753.
132. Lexis M: Activity monitoring technology to support homecare delivery to frail and psychogeriatric elderly persons living at home alone. *Technology & Disability* 2013, 25(3):189-197.
133. Rantz M, Phillips LJ, Galambos C, Lane K, Alexander GL, Despina L, Koopman RJ, Skubic M, Hicks L, Miller S et al: Randomized Trial of Intelligent Sensor System for Early Illness Alerts in Senior Housing. *Journal of the American Medical Directors Association* 2017, 18(10):860-870.
134. Lazarou I, Karakostas A, Stavropoulos TG, Tsompanidis T, Meditskos G, Kompatsiaris I, Tsolaki M: A Novel and Intelligent Home Monitoring System for Care Support of Elders with Cognitive Impairment. *Journal of Alzheimer's Disease* 2016, 54(4):1561-1591.
135. Brown H, Terrence J, Vasquez P, Bates DW, Zimlichman E: Continuous monitoring in an inpatient medical-surgical unit: a controlled clinical trial. *The American journal of medicine* 2014, 127(3):226-232.
136. Zhou J, Liu DB, Zhong JW, Huang ZY, Qiu SY, Zhou YP, Yi XH: Feasibility of a remote monitoring system for home-based non-invasive positive pressure ventilation of children and infants. *International Journal of Pediatric Otorhinolaryngology* 2012, 76(12):1737-1740.
137. Kuroda T, Noma H, Naito C, Tada M, Yamanaka H, Takemura T, Nin K, Yoshihara H: Prototyping sensor network system for automatic vital signs collection: Evaluation of a location based automated assignment of measured vital signs to patients. *Methods of Information in Medicine* 2013, 52(3):239-249.
138. Pigni L, Bovi G, Panzarino C, Gower V, Ferratini M, Andreoni G, Sassi R, Rivolta MW, Ferrarin M: Pilot Test of a New Personal Health System Integrating Environmental and Wearable Sensors for Telemonitoring and Care of Elderly People at Home (SMARTA Project). *Gerontology* 2017, 63(3):281-286.
139. Joussemme C, Vialet R, Jouve E, Lagier P, Martin C, Michel F: Efficacy and mode of action of a noise-sensor light alarm to decrease noise in the pediatric intensive care unit: a prospective, randomized study. In: *Pediatric critical care medicine*. vol. 12; 2011: e69-72.
140. Pot AM, Willemsse BM, Horjus S: A pilot study on the use of tracking technology: Feasibility, acceptability, and benefits for people in early stages of dementia and their informal caregivers. *Aging & Mental Health* 2012, 16(1):127-134.
141. Osaimi AAA, Kadi KA, Saddik B: Role of radio frequency identification in improving infant safety and the extent of nursing staff acceptance of RFID at King Abdulaziz medical city in Riyadh. In: *2017 International Conference on Informatics, Health & Technology (ICIHT): 21-23 Feb. 2017* 2017; 2017: 1-7.
144. Marek K, Stetzer F, Ryan P, Bub L, Adams S, Schlidt A, Lancaster R, O'Brien A: Nurse care coordination and technology effects on health status of frail older adults via enhanced self-management of medication: randomized clinical trial to test efficacy. In: *Nursing research*. vol. 62; 2013: 269-278.
145. Akiyama M, Sasaki Y: Efficacy of the drug administration support system for improving drug compliance in home-care. In: *2013 Proceedings of PICMET '13: Technology Management in the IT-Driven Services (PICMET): July 28 2013-Aug. 1 2013* 2013; 2013: 2538-2542.
146. Suzuki S, Yokoishi T, Hada H, Mitsugi J, Nakamura O, Murai J: Bidirectional medication support system for medical staff and home care patients. In: *2011 5th International Symposium on Medical Information and Communication Technology: 27-30 March 2011* 2011; 2011: 147-151.
147. Vadiei N, Shuman C, Murthy M, Daley M: Optimization of intelligent infusion pump technology to minimize vasopressor pump programming errors. In: *Expert opinion on drug safety*. 2017: 1-5.
148. Orto V, Hendrix CC, Griffith B, Shaikewitz ST: Implementation of a Smart Pump Champions Program to Decrease Potential Patient Harm. *Journal of Nursing Care Quality* 2015, 30(2):138-143.
149. Miller K, Rodger S, Kipping B, Kimble RM: A novel technology approach to pain management in children with burns: A prospective randomized controlled trial. *Burns* (03054179) 2011, 37(3):395-405.
150. Zimmermann C, Zeifelder J, Bloecher T, Diehl M, Essig S, Stork W: Evaluation of a smart drink monitoring device. In: *2017 IEEE Sensors Applications Symposium (SAS): 13-15 March 2017* 2017; 2017: 1-5.



152. Kipping B, Rodger S, Miller K, Kimble RM: Virtual reality for acute pain reduction in adolescents undergoing burn wound care: a prospective randomized controlled trial. *Burns* (03054179) 2012, 38(5):650-657.
153. Mazzacano SD, McSherry T, Atterbury M, Helmold E, Gartner S, Schulman C: Effect of virtual reality distraction therapy on pain and anxiety in adult patients undergoing complex dressing changes: a randomized controlled trial. In: *Journal of burn care and research*. vol. 37; 2016: S157.
154. Patterson D, Soltani M, Teeley A, Morse D, Wiechman S, Gibran N: Hypnosis delivered through immersive virtual reality for wound care: a randomized, controlled study. In: *Journal of burn care and research*. vol. 33; 2012: S70.
156. Lapiere N, Neubauer N, Miguel-Cruz A, Rios Rincon A, Liu L, Rousseau J: The state of knowledge on technologies and their use for fall detection: A scoping review. *International Journal of Medical Informatics* 2018, 111:58-71.
165. Lo YS, Lee WS, Chen GB, Liu CT: Improving the work efficiency of healthcare-associated infection surveillance using electronic medical records. *Computer Methods and Programs in Biomedicine* 2014, 117(2):351-359.
166. Subramaniam P, Woods B: Digital life storybooks for people with dementia living in care homes: an evaluation. In: *Clinical interventions in aging*. vol. 11; 2016: 1263-1276.
167. Bemelmans R, Gelderblom GJ, Jonker P, de Witte L: Effectiveness of Robot Paro in Intramural Psychogeriatric Care: A Multicenter Quasi-Experimental Study. *Journal of the American Medical Directors Association* 2015, 16(11):946-950.
168. Liang A, Piroth I, Robinson H, MacDonald B, Fisher M, Nater UM, Skoluda N, Broadbent E: A Pilot Randomized Trial of a Companion Robot for People With Dementia Living in the Community. *Journal of the American Medical Directors Association* 2017, 18(10):871-878.
169. Moyle W, Cooke M, Beattie E, Jones C, Klein B, Cook G, Gray C: Exploring the effect of companion robots on emotional expression in older adults with dementia: a pilot randomized controlled trial. In: *Journal of gerontological nursing*. vol. 39; 2013: 46-53.
170. Bennett K, Grasso F, Lowers V, McKay A, Milligan C: Evaluation of an App to Support Older Adults with Wounds. In: *Proceedings of the 5th International Conference on Digital Health 2015*: 2015; New York, NY, USA: ACM; 2015: 35-36.
171. Birks M, Bodak M, Barlas J, Harwood J, Pether M: Robotic Seals as Therapeutic Tools in an Aged Care Facility: A Qualitative Study. *Journal of Aging Research* 2016, 2016.
172. Šabanović S, Bennett CC, Chang WL, Huber L: PARO robot affects diverse interaction modalities in group sensory therapy for older adults with dementia. In: 2013 IEEE 13th International Conference on Rehabilitation Robotics (ICORR): 24-26 June 2013 2013; 2013: 1-6.
173. Wagemaker E, Dekkers TJ, Agelink van Rentergem JA, Volkens KM, Huizenga HM: Advances in Mental Health Care: Five N = 1 Studies on the Effects of the Robot Seal Paro in Adults With Severe Intellectual Disabilities. *Journal of Mental Health Research in Intellectual Disabilities* 2017, 10(4):309-320.
174. Iacono I, Marti P: Narratives and emotions in seniors affected by dementia: A comparative study using a robot and a toy. In: 2016 25th IEEE International Symposium on Robot and Human Interactive Communication (RO-MAN): 26-31 Aug. 2016 2016; 2016: 318-323.
175. Wada K, Takasawa Y, Shibata T: Robot therapy at facilities for the elderly in Kanagawa prefecture - a report on the experimental result of the first month. In: *The 23rd IEEE International Symposium on Robot and Human Interactive Communication*: 25-29 Aug. 2014 2014; 2014: 193-198.
