# Supplementary material
Source: publisher site journal article supplement (https://www.dovepress.com/article/286193)
Supplement: Supplementary file 2 [file get_supplementary_file.php]

## Additional file 2: Tabular overview of all included systematic reviews and meta-analyses

| Authors/<br>Year                                                                                                 | Main topic and/<br>or included<br>technologies of<br>interest                                | Search<br>period     | Number of<br>studies                          | Target set-<br>ting/ Target<br>groups<br>(Population) | +,<br>o,<br>+/- <sup>1</sup> | Main results or conclusions with respect to<br>effectiveness as stated by authors                                                                                                                                                                                                                                                                                                                                                                                                                                                                                                                                                                                                                  | Résumé on methodological<br>quality or study limitations ad-<br>dressed explicitly in the studies                                                                          | Level<br>of Evi-<br>dence <sup>2</sup> |
|------------------------------------------------------------------------------------------------------------------|----------------------------------------------------------------------------------------------|----------------------|-----------------------------------------------|-------------------------------------------------------|------------------------------|----------------------------------------------------------------------------------------------------------------------------------------------------------------------------------------------------------------------------------------------------------------------------------------------------------------------------------------------------------------------------------------------------------------------------------------------------------------------------------------------------------------------------------------------------------------------------------------------------------------------------------------------------------------------------------------------------|----------------------------------------------------------------------------------------------------------------------------------------------------------------------------|----------------------------------------|
| <b>Systematic Reviews on Hospital/Care institution information systems, EHR/EMR and Decision support Systems</b> |                                                                                              |                      |                                               |                                                       |                              |                                                                                                                                                                                                                                                                                                                                                                                                                                                                                                                                                                                                                                                                                                    |                                                                                                                                                                            |                                        |
| Meißner<br>and<br>Schnepp<br>2014 [26]                                                                           | Computer-based<br>nursing<br>documentation                                                   | 2000-<br>2013        | 7 studies<br>(quali-<br>tative)               | Residential<br>aged care<br>facilities                | +/-                          | Improvement in the quality of residents' records is assumed to lead to an overall improvement in quality of care. Time management is improved for nurses who are efficient with electronic documentation. "For those who are less efficient with electronic documentation the information processing is perceived as time consuming" (p. 1).                                                                                                                                                                                                                                                                                                                                                       | Evidence is based on a qualitative analysis of qualitative studies. Limitations are based on the different settings and timing of data collection of the included studies. | 4                                      |
| Reis,<br>Maia et<br>al. 2017<br>[25]                                                                             | Cost benefit of<br>of electronic<br>health records<br>and hospital<br>information<br>systems | 2010-<br>2016        | 6<br>Systematic<br>Reviews                    | Hospital                                              | +                            | Some preliminary benefits in quality of care are identified: "Hospital information systems, along with information sharing, had the potential to improve clinical practice by reducing staff errors or incidents, improving automated harm detection, monitoring infections more effectively, and enhancing the continuity of care during physician handoffs" (p.1). The review "did not provide evidence that the eHealth interventions had a measurable impact on cost-effectiveness, mortality, or LOS [length of stay, KH] in hospital settings. Preliminary evidence indicates that the use of eHealth interventions with information exchange may improve clinical process outcomes" (p.10). | Search is based on four databases, the quality of the included studies is rated as poor.                                                                                   | 1a                                     |
| Bright,<br>Wong et<br>al. 2012<br>[66]                                                                           | Electronic<br>clinical decision<br>support systems                                           | Until<br>2010        | 148<br>studies<br>(only RCT<br>with<br>n>=50) | Clinical<br>settings                                  | +                            | "Clinical decision support had a favorable effect on prescribing treatments, facilitating preventive care services, and ordering clinical studies across diverse venues and systems" (p. 38). 86% of the studies assessed health care process measures, 20% assessed clinical outcomes, and 15% measured costs. "Few studies measured potential unintended consequences or adverse effects" (p. 29). Clinical decision support systems improve "health care process measures across diverse settings, but evidence for clinical, economic, workload, and efficiency outcomes remains sparse" (p. 29). (The study is part of Lobach et al. 2012, see below)                                         | Studies were heterogeneous in interventions, populations, settings, and outcomes. Publication bias and selective reporting cannot be excluded.                             | 1a                                     |
| Lobach,<br>Sanders<br>et al.<br>2012 [67]                                                                        | Clinical decision<br>support systems<br>(CDSS) and<br>knowledge                              | 1976-<br>Dez<br>2010 | 311<br>studies,<br>(only<br>studies)          | No<br>restrictions                                    | +                            | "Both commercially and locally developed CDSSs effectively improved health care process measures related to performing preventive service (...), ordering clinical studies (...), and prescribing therapies (...). Evidence for the effectiveness of CDSSs on clinical outcomes and costs and KMSs on any                                                                                                                                                                                                                                                                                                                                                                                          | Studies were heterogeneous in interventions, populations, settings, and outcomes. Publication bias and selective reporting cannot be excluded.                             | 1a                                     |

<sup>1</sup> Direction of effect; abbreviations: +=positive effect, -=negative effect, o=no effect, +/- =ambivalent effects

<sup>2</sup> Level of evidence is depending on the highest level of evidence of the included studies, Level of Evidence and related study design: 1a=Reviews that include more than one Randomised controlled trial (RCT); 1b=RCT; 2= Controlled studies, without randomisation, ie, quasi-experiments; 3= Case-control or Cohort studies; 4: Findings obtained from descriptive, other observational and/or qualitative research designs (including case studies), cross sectional studies, user studies.

| Authors/<br>Year                                   | Main topic and/<br>or included<br>technologies of<br>interest                                                                                         | Search<br>period     | Number of<br>studies                                 | Target set-<br>ting/ Target<br>groups<br>(Population) | +,<br>o,<br>+/- <sup>1</sup> | Main results or conclusions with respect to<br>effectiveness as stated by authors                                                                                                                                                                                                                                                                                                                                                                                                                                                                                                                                | Résumé on methodological<br>quality or study limitations ad-<br>dressed explicitly in the studies                                                                                                                                                                                                                                                                                                            | Level<br>of Evi-<br>dence <sup>2</sup> |
|----------------------------------------------------|-------------------------------------------------------------------------------------------------------------------------------------------------------|----------------------|------------------------------------------------------|-------------------------------------------------------|------------------------------|------------------------------------------------------------------------------------------------------------------------------------------------------------------------------------------------------------------------------------------------------------------------------------------------------------------------------------------------------------------------------------------------------------------------------------------------------------------------------------------------------------------------------------------------------------------------------------------------------------------|--------------------------------------------------------------------------------------------------------------------------------------------------------------------------------------------------------------------------------------------------------------------------------------------------------------------------------------------------------------------------------------------------------------|----------------------------------------|
|                                                    | management<br>systems (KMS)                                                                                                                           |                      | with<br>n>=50)                                       |                                                       |                              | outcomes is minimal" (p. V).<br>Based on a meta-analysis the study managed to identify or<br>confirm "nine features of CDSSs/KMS that correlate with suc-<br>cessful impact of clinical decision support" (p. V.).                                                                                                                                                                                                                                                                                                                                                                                               |                                                                                                                                                                                                                                                                                                                                                                                                              |                                        |
| Roshano<br>v,<br>Fernande<br>s et al.<br>2013 [68] | Identification of<br>factors that<br>differentiate<br>between<br>effective and<br>ineffective<br>computerised<br>clinical decision<br>support systems | 1973-<br>2009        | Meta-<br>regression<br>of 162<br>RCTs                | No<br>restrictions                                    | +/o                          | 58% of the included trials "showed improvements in pro-<br>cesses of care or patient outcomes" (p. 3).<br>Several factors were identified that partially explain success<br>or fail of the system: Odds of success were greater for sys-<br>tems that "provided advice for patients in addition to practi-<br>tioners (...), required practitioners to supply a reason for<br>over-riding advice (...), or were evaluated by their develop-<br>ers" (p. 1).<br>In contrast, the presentation of "advice in electronic charting<br>or order entry system interfaces were less likely to be effec-<br>tive" (p.1). | Although based on randomized<br>controlled trials, the "analysis re-<br>mains observational and the<br>findings should not be inter-<br>preted as if they were based on<br>head to head trials of features of<br>computerised clinical decision<br>support systems. Failure to in-<br>clude important covariates in (..) [the] models could have biased<br>the estimates and given false<br>findings" (p.4). | 1a                                     |
| <b>Systematic Reviews on Telecare</b>              |                                                                                                                                                       |                      |                                                      |                                                       |                              |                                                                                                                                                                                                                                                                                                                                                                                                                                                                                                                                                                                                                  |                                                                                                                                                                                                                                                                                                                                                                                                              |                                        |
| Capurro,<br>Ganzinge<br>r et al.<br>2014 [79]      | E-health in<br>palliative care                                                                                                                        | Until<br>Jun<br>2012 | 17 studies<br>(no RCTs)                              | Outpatient<br>palliative<br>care                      | +                            | "Some studies reported some improvement on quality of<br>care, documentation effort, cost, and communications" (p. 1).<br>One study reports quantitative results (lower number of hos-<br>pitalizations, less emergency room visits and bed days (after<br>introduction of text messaging and videophone devices). No<br>study described "patient-relevant clinical outcomes" (p. 7).                                                                                                                                                                                                                            | "Studies tended to be observa-<br>tional, non-controlled studies,<br>and a few quasi-experimental<br>studies. Overall there was great<br>heterogeneity in the types of in-<br>terventions and outcome as-<br>sessments" (p.1).                                                                                                                                                                               | 2                                      |
| Davies,<br>Rixon et<br>al. 2013<br>[23]            | Telecare                                                                                                                                              | Until<br>Nov<br>2009 | 7 studies                                            | Outcomes<br>on informal<br>carers                     | +                            | "The evidence tentatively indicated that telecare exerts a<br>positive effect on carer stress and strain, but there is no evi-<br>dence to indicate benefits on burden or quality of life" (p.<br>582). Evidence on the amount of time spent on caring duties<br>and "on relationships between the carer, cared-for person<br>and other family members" (p. 582) is inconsistent.                                                                                                                                                                                                                                | "All included evaluations were<br>rated as being of weak method-<br>ological quality, indicating risk of<br>bias within the evidence base"<br>(p. 582).                                                                                                                                                                                                                                                      | 2                                      |
| Karlsen,<br>Ludvigse<br>n et al.<br>2017 [81]      | Telecare                                                                                                                                              | 2005-<br>2017        | 11<br>qualitative<br>studies                         | Outpatient<br>long-term<br>care                       | +                            | "The experiences with the use of telecare are diverse. Find-<br>ings indicate telecare systems can promote safety and secu-<br>rity to age in place. However, (...) Telecare systems must fit<br>individual needs, and be supported by service providers to<br>accommodate sustainable use over time" (p. 2913).                                                                                                                                                                                                                                                                                                 | "The duration of use of telecare<br>devices was not well described<br>in many of the included studies,<br>which likely affected participants'<br>experiences" (p. 2932).                                                                                                                                                                                                                                     | 4                                      |
| Oliver,<br>Demiris<br>et al.<br>2012 [80]          | Telehospice                                                                                                                                           | 2000-<br>Mar<br>2010 | 26 studies<br>(3 studies<br>on clinical<br>outcomes) | Outpatient<br>palliative<br>care                      | o                            | None of the 3 studies with clinical outcomes (patient anxiety,<br>caregiver quality of live, communication anxiety, caregiver<br>perceptions of pain medication) "was large enough to find<br>significance in these clinical measures" (p. 45).                                                                                                                                                                                                                                                                                                                                                                  | "The evidence base, although<br>growing and promising, is of<br>mixed scientific rigor with lower-<br>medium strength evidence in<br>quantitative studies and me-<br>dium-higher strength evidence in<br>qualitative studies" (p. 46).                                                                                                                                                                       | 2                                      |

| Authors/<br>Year                                              | Main topic and/<br>or included<br>technologies of<br>interest                                             | Search<br>period     | Number of<br>studies                               | Target set-<br>ting/ Target<br>groups<br>(Population)               | +,<br>o,<br>+/- <sup>1</sup> | Main results or conclusions with respect to<br>effectiveness as stated by authors                                                                                                                                                                                                                                                                                                                                                                                                                                                                                                                                                                                                                                                                            | Résumé on methodological<br>quality or study limitations ad-<br>dressed explicitly in the studies                                                                                                                                                                                                             | Level<br>of Evi-<br>dence <sup>2</sup> |
|---------------------------------------------------------------|-----------------------------------------------------------------------------------------------------------|----------------------|----------------------------------------------------|---------------------------------------------------------------------|------------------------------|--------------------------------------------------------------------------------------------------------------------------------------------------------------------------------------------------------------------------------------------------------------------------------------------------------------------------------------------------------------------------------------------------------------------------------------------------------------------------------------------------------------------------------------------------------------------------------------------------------------------------------------------------------------------------------------------------------------------------------------------------------------|---------------------------------------------------------------------------------------------------------------------------------------------------------------------------------------------------------------------------------------------------------------------------------------------------------------|----------------------------------------|
| <b>Systematic Reviews on other Communication Technologies</b> |                                                                                                           |                      |                                                    |                                                                     |                              |                                                                                                                                                                                                                                                                                                                                                                                                                                                                                                                                                                                                                                                                                                                                                              |                                                                                                                                                                                                                                                                                                               |                                        |
| Arditi,<br>Rège-<br>Walther<br>et al.<br>2012 [91]            | Computer<br>generated<br>reminders<br>(delivered on<br>paper)                                             | Until<br>2011        | 32 studies                                         | Mainly<br>outpatient<br>care in North<br>America                    | +                            | Interventions “achieved moderate improvement in profes-<br>sional practices, with a median improvement of processes of<br>care of 7.0% (...). In the only study that had sufficient power<br>to detect a clinically significant effect on outcomes of care,<br>reminders were not associated with significant improve-<br>ments”(p. 2).                                                                                                                                                                                                                                                                                                                                                                                                                      | “The quality of evidence for<br>these comparisons was rated as<br>moderate according to the<br>GRADE approach” (p. 2).                                                                                                                                                                                        | 1a                                     |
| Bhattarai<br>and<br>Phillips<br>2017 [92]                     | Digital<br>technologies for<br>pain<br>management<br>(Coaching &<br>Assessment)                           | 2000-<br>Aug<br>2015 | 9 studies                                          | Older<br>people’s<br>pain<br>management<br>across care-<br>settings | o                            | “There is insufficient evidence demonstrating the effective-<br>ness of digital health technologies in reducing older people’s<br>pain intensity and pain interference” (p. 23), but there are<br>some contradictory findings, indicating a need for further re-<br>search.                                                                                                                                                                                                                                                                                                                                                                                                                                                                                  | “There is lack of high-quality<br>studies investigating the effec-<br>tiveness of digital health technol-<br>ogies in management of older<br>people’s pain, with most limited<br>to pilot or feasibility studies that<br>do not appear to have led to<br>larger adequately powered<br>phase III RCTs” (p.22). | 1a                                     |
| Fagerström,<br>Tuvesson<br>et al.<br>2017 [94]                | Information and<br>communication<br>technologies in<br>general                                            | 2009-<br>2015        | 20 studies                                         | Nursing<br>practice in<br>Sweden                                    | +/-                          | The “review indicates that ICT integration into nursing prac-<br>tice is a complex process that impacts nurses’ communica-<br>tion and relationships in patient care, working conditions, and<br>professional identities and development” (p. 434).                                                                                                                                                                                                                                                                                                                                                                                                                                                                                                          | “Due to the variety of aims and<br>research questions in the quali-<br>tative and quantitative studies<br>(..) examined, it was difficult to<br>provide an all-encompassing un-<br>derstanding of the role of ICT in<br>nursing settings” (p. 445).                                                           | 4                                      |
| Hu, Kung<br>et al.<br>2015 [19]                               | Internet based<br>interventions to<br>decrease<br>caregiver stress                                        | Until<br>2013        | 24 studies<br>(16 RCTs,<br>8 open<br>label trials) | Informal<br>caregivers                                              | +/o                          | Three out of eight included open-label studies reported “posi-<br>tive benefit in reducing caregiver stress, four were partially<br>positive (...), and one was a negative study” (p. e194).<br>Six out of the 16 included RCTs “showed positive benefit,<br>five were partially positive and five were negative. There<br>were no clear patterns as to the variables (...) associated<br>with better outcomes” (p. e194).                                                                                                                                                                                                                                                                                                                                   | (No limitations are discussed in<br>the study, KH).                                                                                                                                                                                                                                                           | 1a                                     |
| Mickan,<br>Atherton<br>et al.<br>2014 [93]                    | Personal digital<br>assistants used<br>to access<br>information or<br>support clinical<br>decision making | 2001-<br>Aug<br>2013 | 7 studies<br>(small<br>RCTs)                       | Healthcare<br>professionals<br>in clinical<br>settings              | +                            | <b>Accessing Information:</b> “When healthcare professionals<br>used handheld computers to access clinical information, their<br>knowledge improved significantly more than peers who used<br>paper resources” (p. 1) (based on 2 pilot RCTs).<br><b>Adherence to guidelines:</b> “When clinical guideline recom-<br>mendations were presented on handheld computers, clini-<br>cians made significantly safer prescribing decisions and ad-<br>hered more closely to recommendations than peers using<br>paper resources” (p. 1) (based on 2 feasibility RCTs).<br><b>Diagnostic Decision making:</b> “healthcare professionals<br>made significantly more appropriate diagnostic decisions us-<br>ing clinical decision-making tools on handheld computers | Only RCTs included. Only 4 of<br>the 7 studies “reported convinc-<br>ing, statistically significant evi-<br>dence (...). The heterogeneity of<br>study designs and purposes<br>makes the synthesis of this liter-<br>ature difficult” (p. 8).                                                                 | 1b                                     |

| Authors/<br>Year                                         | Main topic and/<br>or included<br>technologies of<br>interest                             | Search<br>period      | Number of<br>studies                               | Target set-<br>ting/ Target<br>groups<br>(Population) | +,<br>o,<br>+/- <sup>1</sup> | Main results or conclusions with respect to<br>effectiveness as stated by authors                                                                                                                                                                                                                                                                                           | Résumé on methodological<br>quality or study limitations ad-<br>dressed explicitly in the studies                                                                   | Level<br>of Evi-<br>dence <sup>2</sup> |
|----------------------------------------------------------|-------------------------------------------------------------------------------------------|-----------------------|----------------------------------------------------|-------------------------------------------------------|------------------------------|-----------------------------------------------------------------------------------------------------------------------------------------------------------------------------------------------------------------------------------------------------------------------------------------------------------------------------------------------------------------------------|---------------------------------------------------------------------------------------------------------------------------------------------------------------------|----------------------------------------|
|                                                          |                                                                                           |                       |                                                    |                                                       |                              | compared to colleagues who did not have access to these tools" (p. 1) (based on 3 pilot RCTs).                                                                                                                                                                                                                                                                              |                                                                                                                                                                     |                                        |
| <b>Systematic Reviews on Robotic Technologies</b>        |                                                                                           |                       |                                                    |                                                       |                              |                                                                                                                                                                                                                                                                                                                                                                             |                                                                                                                                                                     |                                        |
| Bemelma<br>ns,<br>Gelderbl<br>om et al.<br>2012 [1]      | Socially<br>assistive robots<br>(mostly<br>animaloid)                                     | Until<br>sept<br>2009 | 41 publi-<br>cations on<br>17 studies              | Elderly Care                                          | +                            | "Most studies reported positive effects of companion-type robots on (socio)psychological (eg, mood, loneliness, and social connections and communication) and physiological (eg, stress reduction) parameters" (p. 114).                                                                                                                                                    | "The methodological quality of the included studies was mostly low" (p. 114) (very small sample sizes, 1 RCT included with n=12 in intervention group).             | 2                                      |
| Kachouie<br>,<br>Sedighad<br>eli et al.<br>2014<br>[113] | Socially<br>assistive robots<br>(13 different<br>robots included,<br>mostly<br>animaloid) | Until<br>2012         | 68 studies<br>(37 study<br>groups)                 | Elderly Care                                          | +                            | Most studies report positive effects on well-being, only few studies report negative or no effects                                                                                                                                                                                                                                                                          | Generalizability of outcomes is problematic, methodological quality is mostly low, most studies without control groups, mostly situated in Japan.                   | 2                                      |
| Pearce,<br>Adair et<br>al. 2012<br>[112]                 | Robotic devices<br>enabling older<br>people to live at<br>home                            | 1990-<br>2012         | 42 studies<br>(4 studies<br>on effec-<br>tiveness) | Older people<br>living at<br>home                     | +                            | Exoskeleton: "improved walking speed and reduced energy expenditure" (p. 3)<br>Robotic Wheelchair: maneuvering less mentally demanding than hand control                                                                                                                                                                                                                    | Only very limited evidence on effectiveness available, all studies are small and situated in laboratory setting                                                     | 4                                      |
| <b>Systematic Reviews on Monitoring/Sensors</b>          |                                                                                           |                       |                                                    |                                                       |                              |                                                                                                                                                                                                                                                                                                                                                                             |                                                                                                                                                                     |                                        |
| Choi,<br>Lawler et<br>al. 2011<br>[176]                  | Fall prevention<br>strategies in<br>general<br>(including bed-<br>alarm systems)          | 1990-<br>2009         | 34 studies                                         | Fall<br>prevention in<br>hospital<br>settings         | o                            | Only 2 of the studies refer to digital technologies: "Despite observing a clinical tendency towards fall reduction, studies investigating the efficacy of a bed alarm system did not observe a statistically significant reduction in the number of falls" (p. 2517)                                                                                                        | The methodological quality of the included studies is moderate. (The specific technology included remains unclear, KH).                                             | 2                                      |
| Kosse,<br>Brands et<br>al. 2013<br>[142]                 | Sensor<br>technologies for<br>fall prevention                                             | Until<br>2011         | 12 studies                                         | Elderly<br>persons in<br>hospital or<br>nursing care  | +/o                          | 3 RCTs "reported no reduction in falls, but three before-after studies reported significant reductions of (..) falls (...). The current data "is inconsistent whether current sensor technologies are effective in reducing fall rates in institutionalized geriatric patients" (p. 743). False alarm rates are often high.                                                 | "The relatively low methodological quality of the included studies and the low number of the studies limit the conclusion (...) the (..) review can offer" (p. 751) | 1a                                     |
| Walia,<br>Wong et<br>al. 2016<br>[143]                   | Monitoring<br>Devices to<br>prevent<br>pressure injuries                                  | 2005-<br>Jan<br>2016  | 9 studies<br>(2 studies<br>in meta-<br>analysis)   | Any setting<br>and target<br>group                    | +                            | "All studies included reported a significant reduction in the risk factors for and/or the incidence of PIs [pressure Injuries, KH]. The (..) meta-analysis showed that risk of developing new PIs may be 88% lower than without the use of monitoring devices" (p. 572).                                                                                                    | No RCTs included, but methodological quality of non-randomized and observational studies was rated good.                                                            | 2                                      |
| <b>Systematic Reviews on Assistive Devices</b>           |                                                                                           |                       |                                                    |                                                       |                              |                                                                                                                                                                                                                                                                                                                                                                             |                                                                                                                                                                     |                                        |
| Anttila,<br>Samuels<br>on et al.<br>2012<br>[157]        | Assistive<br>Technologies<br>(AT) for people<br>with disabilities                         | 2000-<br>Apr<br>2010  | 44<br>Systematic<br>Reviews                        | People with<br>disabilities                           | +                            | Most of the included reviews assess non-digital AT. Two Reviews on digital AT for people with dementia are included, that identify some positive effects. One of the review has moderate limitations, the other one major limitations in study quality.<br>Two reviews on powered mobility devices identify beneficial effects based on low to moderate levels of evidence. | "Low-quality or unclear evidence was found for the effectiveness of (...) [most] evaluated AT interventions" (p. 9).                                                | unclear                                |

| Authors/<br>Year                                        | Main topic and/<br>or included<br>technologies of<br>interest                                                                                             | Search<br>period     | Number of<br>studies                                | Target set-<br>ting/ Target<br>groups<br>(Population)        | +,<br>o,<br>+/- <sup>1</sup> | Main results or conclusions with respect to<br>effectiveness as stated by authors                                                                                                                                                                                                                                                                                                                      | Résumé on methodological<br>quality or study limitations ad-<br>dressed explicitly in the studies                                                                                                                                                                                                                               | Level<br>of Evi-<br>dence <sup>2</sup> |
|---------------------------------------------------------|-----------------------------------------------------------------------------------------------------------------------------------------------------------|----------------------|-----------------------------------------------------|--------------------------------------------------------------|------------------------------|--------------------------------------------------------------------------------------------------------------------------------------------------------------------------------------------------------------------------------------------------------------------------------------------------------------------------------------------------------------------------------------------------------|---------------------------------------------------------------------------------------------------------------------------------------------------------------------------------------------------------------------------------------------------------------------------------------------------------------------------------|----------------------------------------|
| Nicolson,<br>Moir et<br>al. 2012<br>[177]               | Assistive<br>Technologies<br>(AT) for children<br>with disability                                                                                         | Until<br>2011        | 4 studies,<br>1<br>systematic<br>review             | Informal<br>caregivers of<br>children with<br>disability     | +                            | “Three articles reported that AT lightened caregiver assistance in the areas of mobility, self-care and social function” (p. 345). Besides adaptive seating devices and switches it remains unclear what type of technology has been studied in the studies.                                                                                                                                           | Two studies are of moderate,<br>two studies of low methodologi-<br>cal quality.                                                                                                                                                                                                                                                 | 2                                      |
| Van der<br>Roest,<br>Wenborn<br>et al.<br>2017<br>[151] | Assistive<br>Technology for<br>memory support                                                                                                             | Until<br>Feb<br>2017 | No study<br>met inclu-<br>sion<br>criteria<br>(RCT) | People with<br>dementia                                      |                              | No studies included                                                                                                                                                                                                                                                                                                                                                                                    |                                                                                                                                                                                                                                                                                                                                 |                                        |
| <b>Systematic Reviews on Multiple Technologies</b>      |                                                                                                                                                           |                      |                                                     |                                                              |                              |                                                                                                                                                                                                                                                                                                                                                                                                        |                                                                                                                                                                                                                                                                                                                                 |                                        |
| Ofek<br>Shlomai,<br>Rao et al.<br>2015<br>[178]         | Handhygiene<br>interventions<br>(reminders on<br>PC screen<br>savers, e-mails,<br>educational<br>performance<br>feedback by UV-<br>sensor)                | Until<br>2013        | 16 studies                                          | Neonatal<br>intensive<br>care units<br>(NICU)                | +                            | Meta-analysis “indicated that a range of strategies, such as educational campaigns, musical parodies, reminders, easy access to hand hygiene sanitisers, UV sensors and performance feedback, improved HHC [hand hygiene compliance, KH]” (p. 887).<br>“Strategies to improve HHC in NICUs seem to be more effective when they include performance feedback at the personal or group levels” (p. 887). | No RCT included, significant<br>statistical heterogeneity in the<br>studies, “duration of follow-up<br>was inadequate in the majority<br>of the studies” (p. 896).                                                                                                                                                              |                                        |
| Fleming<br>and Sum<br>2014 [2]                          | Assistive Tech-<br>nologies (AAL,<br>Tracking, Assis-<br>tive Devices,<br>Telecare)                                                                       | 1995-<br>2011        | 41 studies                                          | People with<br>dementia                                      | +/-                          | Diverse findings for a broad range of technologies are pre-<br>sented. Results are reported qualitatively, focused on the fol-<br>lowing topics: independence, prompts and reminders, safety<br>and security, leisure and lifestyle, communication and tele-<br>health, therapeutic interventions.                                                                                                     | “The studies are usually limited<br>by very small samples, high<br>drop-out rates, very basic statis-<br>tical analyses and lack of adjust-<br>ment for multiple comparisons<br>and poor performance of the<br>technology itself” (p. 14).                                                                                      | 1a                                     |
| Khosravi<br>and<br>Ghapanc<br>hi 2016<br>[4]            | Technologies<br>applied to assist<br>seniors (ICT,<br>Robotics, Tele-<br>medicine, Sen-<br>sor technology,<br>medication man-<br>agement, Smart<br>Games) | 2000-<br>2014        | 41 studies                                          | Seniors<br>aged 60<br>years or<br>older                      | +                            | “The effectiveness of the technologies in the studies include health outcomes (...), social influence (eg, caregiving benefits, independent living and hospital readmission), and well-being (...). The major findings (...) showed that a number of the technologies have a positive impact on enhancing seniors’ lives” (p. 23).                                                                     | “Most of the studies in the final<br>pool were experimental, making<br>it difficult to provide robust con-<br>clusion. (...) Most of the studies<br>suffer from small sample size;<br>therefore, the findings (...) did<br>not validate strong evidence to<br>support the effectiveness of the<br>assistive technology” (p. 24) | 1a                                     |
| Liu,<br>Stroulia<br>et al.<br>2016 [3]                  | Smart homes<br>and home based<br>health-monitor-<br>ing                                                                                                   | Until<br>Oct<br>2014 | 48 studies<br>(18 studies<br>on effec-<br>tiveness) | Home or<br>supportive<br>care<br>environm-<br>ents for older | +/-                          | “There is no evidence that smart homes and home health monitoring technologies help address disability prediction and health-related quality of life, or fall prevention; and (..) there is conflicting evidence that (...) [they] help address chronic obstructive pulmonary disease” (p. 44).                                                                                                        | No meta-analysis performed<br>“because of the heterogeneity of<br>the technologies used, the medi-<br>cal conditions and disability ad-<br>dressed with those technologies                                                                                                                                                      | 1a                                     |

| Authors/<br>Year                                | Main topic and/<br>or included<br>technologies of<br>interest                                  | Search<br>period         | Number of<br>studies                                        | Target set-<br>ting/ Target<br>groups<br>(Population)    | +,<br>o,<br>+/- <sup>1</sup> | Main results or conclusions with respect to<br>effectiveness as stated by authors                                                                                                                                                                                                                                                                                                                                                                                                                                                              | Résumé on methodological<br>quality or study limitations ad-<br>dressed explicitly in the studies                                                                                                                                                                             | Level<br>of Evi-<br>dence <sup>2</sup> |
|-------------------------------------------------|------------------------------------------------------------------------------------------------|--------------------------|-------------------------------------------------------------|----------------------------------------------------------|------------------------------|------------------------------------------------------------------------------------------------------------------------------------------------------------------------------------------------------------------------------------------------------------------------------------------------------------------------------------------------------------------------------------------------------------------------------------------------------------------------------------------------------------------------------------------------|-------------------------------------------------------------------------------------------------------------------------------------------------------------------------------------------------------------------------------------------------------------------------------|----------------------------------------|
|                                                 |                                                                                                |                          |                                                             | adults (60<br>years and<br>older)<br>/outpatient<br>care |                              |                                                                                                                                                                                                                                                                                                                                                                                                                                                                                                                                                | and the outcomes reported in<br>the studies included”<br>(p. 57).<br>(The study claims that studies<br>published before 2010 were ex-<br>cluded, but actually included<br>study range is from 2004-2014,<br>KH)                                                               |                                        |
| Manias,<br>Williams<br>et al.<br>2012<br>[179]  | Interventions to<br>reduce<br>mediation errors<br>(Decision<br>support, CPOE,<br>smart pumps)  | Until<br>Oct<br>2011     | 24 studies                                                  | ICU                                                      | +/-                          | “Sixteen out of the 24 studies demonstrated statistically significant reductions in medication error rates. Four studies showed increased medication error rates and four studies demonstrated no change or an unclear effect” (p. 412).<br>“Four intervention types demonstrated reduced medication errors post-intervention: CWS, ME, MR and PG [changes in work schedules, modes of education, medication reconciliation and protocols and guidelines, KH]” (p. 411). Mixed results were found on CPOE and Decision Support Systems.        | “It is not possible to promote any interventions as positive models for reducing medication errors. Insufficient research was undertaken with any particular type of intervention, and there were concerns regarding the level of evidence and quality of research” (p. 411). | 1a                                     |
| McKib-<br>bon,<br>Lokker et<br>al. 2011<br>[59] | Impact of health<br>information<br>technology on<br>medication<br>management<br>process (MMIT) | Until<br>summe<br>r 2010 | 428<br>studies<br>(377<br>studies on<br>effec-<br>tiveness) | No<br>restrictions                                       | +                            | “Process and other outcomes related to use and satisfaction with MMIT were often improved, especially for prescribing and ordering and the monitoring phases. Improvements in the appropriateness of prescribing and decreased errors (...) seem to be consistently shown” (p. 100).<br>Less frequently addressed are changes in workflow, improvements in communication and time reductions that are often positive. Clinical endpoints improved sometimes, but this was shown more often in observational studies than in controlled trials. | Study quality varied according to<br>phase of medication manage-<br>ment.<br>Study outcomes and discussed<br>limitations are too broad to be<br>represented adequately in this<br>table.                                                                                      | 1a                                     |
| McKib-<br>bon,<br>Lokker et<br>al. 2012<br>[60] | Impact of health<br>information<br>technology on<br>medication<br>management<br>process (MMIT) | Until<br>summe<br>r 2010 | 87 studies<br>(RCTs<br>only)                                | No<br>restrictions                                       | +/o                          | “Processes of care improved for prescribing and monitoring mostly in hospital settings, but the few studies measuring clinical outcomes showed small or no improvements” (p. 22).<br>Most of the RCTs were situated in hospitals and clinics, only some of the studies included nurses. The analyzed technologies were mostly clinical decision support and computerized provider order entry systems. (The study is an analysis of the RCTs included in McKibbon et al. 2011.)                                                                | “Few studies measured clinical<br>outcomes. (...) [The] large body<br>of literature, although instructive,<br>is not uniformly distributed<br>across settings, people, medica-<br>tion phases, or outcomes”<br>(p. 22).                                                       | 1a                                     |

| Authors/<br>Year                                  | Main topic and/<br>or included<br>technologies of<br>interest                                                                                                                                                       | Search<br>period     | Number of<br>studies | Target set-<br>ting/ Target<br>groups<br>(Population) | +,<br>o,<br>+/- <sup>1</sup> | Main results or conclusions with respect to<br>effectiveness as stated by authors                                                                                                                                                                                                                                                                                                                                                                                           | Résumé on methodological<br>quality or study limitations ad-<br>dressed explicitly in the studies                                                                                                                                                                                                                              | Level<br>of Evi-<br>dence <sup>2</sup>   |
|---------------------------------------------------|---------------------------------------------------------------------------------------------------------------------------------------------------------------------------------------------------------------------|----------------------|----------------------|-------------------------------------------------------|------------------------------|-----------------------------------------------------------------------------------------------------------------------------------------------------------------------------------------------------------------------------------------------------------------------------------------------------------------------------------------------------------------------------------------------------------------------------------------------------------------------------|--------------------------------------------------------------------------------------------------------------------------------------------------------------------------------------------------------------------------------------------------------------------------------------------------------------------------------|------------------------------------------|
| Vedel,<br>Akhlaghp<br>our et al.<br>2013<br>[180] | Application of<br>health informa-<br>tion technolo-<br>gies in geriatrics<br>& gerontology<br>(telecare, EHR,<br>decision support,<br>web-based<br>support for<br>patients/ family<br>care-givers,<br>assistive IT) | 2000-<br>Apr<br>2010 | 112<br>studies       | Older adults                                          | +                            | The main outcomes that were analyzed are:<br>- Impact on clinical processes (65 studies, 94% positive re-<br>sults)<br>- Patients' satisfaction (33 studies, 82% positive results)<br>- Patients' health outcomes (25 studies, 96% positive results)<br>- Impacts on productivity, efficiency or costs (16 studies, 88%<br>positive results)<br>- Patients' empowerment (15 studies, 80% positive results)<br>- Clinicians' satisfaction (13 studies, 85% positive results) | "The quality of the studies in-<br>cluded varies considerably. Nev-<br>ertheless, a sensitivity analysis<br>did not reveal that inclusion of<br>poor quality studies was skewing<br>the results" (p. 116). A publi-<br>cation bias due to the more fre-<br>quent publication of studies with<br>positive outcomes is possible. | Type of included studies not<br>reported |

## References

(Numbering refers to main text and table)

1. Bemelmans, R., G. J. Gelderblom, P. Jonker and L. de Witte (2012). "Socially Assistive Robots in Elderly Care: A Systematic Review into Effects and Effectiveness." *Journal of the American Medical Directors Association* 13(2): 114-120.e111.
2. Fleming, R. and S. Sum (2014). "Empirical studies on the effectiveness of assistive technology in the care of people with dementia: A systematic review." *Journal of Assistive Technologies* 8(1): 14-34.
3. Liu, L., E. Stroulia, I. Nikolaidis, A. Miguel-Cruz and A. Rios Rincon (2016). "Smart homes and home health monitoring technologies for older adults: A systematic review." *International Journal of Medical Informatics* 91: 44-59.
4. Khosravi, P. and A. H. Ghapanchi (2016). "Investigating the effectiveness of technologies applied to assist seniors: A systematic literature review." *Int J Med Inform* 85(1): 17-26.
19. Hu, C., S. Kung, T. A. Rummans, M. M. Clark and M. I. Lapid (2015). "Reducing caregiver stress with internet-based interventions: a systematic review of open-label and randomized controlled trials." *J Am Med Inform Assoc* 22(e1): e194-209.
23. Davies, A., L. Rixon and S. Newman (2013). "Systematic review of the effects of telecare provided for a person with social care needs on outcomes for their informal carers." *Health & Social Care in the Community* 21(6): 582-597.
25. Reis, Z. S. N., T. A. Maia, M. S. Marcolino, F. Becerra-Posada, D. Novillo-Ortiz and A. L. P. Ribeiro (2017). "Is There Evidence of Cost Benefits of Electronic Medical Records, Standards, or Interoperability in Hospital Information Systems? Overview of Systematic Reviews." *JMIR Med Inform* 5(3): e26.
26. Meißner, A. and W. Schnepf (2014). "Staff experiences within the implementation of computer-based nursing records in residential aged care facilities: a systematic review and synthesis of qualitative research."
59. McKibbin, K. A., C. Lokker, S. M. Handler, L. R. Dolovich, A. M. Holbrook, D. O'Reilly, R. Tamblyn, J. H. B, R. Basu, S. Troyan, P. S. Roshanov, N. P. Archer and P. Raina (2011). "Enabling medication management through health information technology (Health IT)." *Evid Rep Technol Assess (Full Rep)*(201): 1-951.
60. McKibbin, K. A., C. Lokker, S. M. Handler, L. R. Dolovich, A. M. Holbrook, D. O'Reilly, R. Tamblyn, B. J. Hemens, R. Basu, S. Troyan, P. S. Roshanov, K. A. McKibbin, C. Lokker, S. M. Handler, L. R. Dolovich, A. M. Holbrook, D. O'Reilly, R. Tamblyn, B. J. Hemens and R. Basu (2012). "The effectiveness of integrated health information technologies across the phases of medication management: a systematic review of randomized controlled trials." *Journal of the American Medical Informatics Association* 19(1): 22-30.
66. Bright, T. J., A. Wong, R. Dhurjati, E. Bristow, L. Bastian, R. R. Coeytaux, G. Samsa, V. Hasselblad, J. W. Williams, M. D. Musty, L. Wing, A. S. Kendrick, G. D. Sanders and D. Lobach (2012). "Effect of clinical decision-support systems: A systematic review." *Annals of Internal Medicine* 157(1): 29-43.

67. Lobach, D., G. D. Sanders, T. J. Bright, A. Wong, R. Dhurjati, E. Bristow, L. Bastian, R. Coeytaux, G. Samsa, V. Hasselblad, J. W. Williams, L. Wing, M. Musty and A. S. Kendrick (2012). "Enabling health care decisionmaking through clinical decision support and knowledge management." *Evidence report/technology assessment*(203): 1-784.
68. Roshanov, P. S., N. Fernandes, J. M. Wilczynski, B. J. Hemens, J. J. You, S. M. Handler, R. Nieuwlaat, N. M. Souza, J. Beyene, H. G. C. Van Spall, A. X. Garg and R. B. Haynes (2013). "Features of effective computerised clinical decision support systems: Meta-regression of 162 randomised trials." *BMJ (Online)* 346(7899).
79. Capurro, D., M. Ganzinger, J. Perez-Lu and P. Knaup (2014). "Effectiveness of eHealth interventions and information needs in palliative care: a systematic literature review." *J Med Internet Res* 16(3): e72.
80. Oliver, D. P., G. Demiris, E. Wittenberg-Lyles, K. Washington, T. Day and H. Novak (2012). "A systematic review of the evidence base for telehospice." *Telemed J E Health* 18(1): 38-47.
81. Karlsen, C., M. S. Ludvigsen, C. E. Moe, K. Haraldstad and E. Thygesen (2017). "Experiences of community-dwelling older adults with the use of telecare in home care services: a qualitative systematic review." *JBI Database of Systematic Reviews & Implementation Reports* 15(12): 2913-2980.
91. Arditi, C., M. Rège-Walther, J. C. Wyatt, P. Durieux and B. Burnand (2012). "Computer-generated reminders delivered on paper to healthcare professionals; effects on professional practice and health care outcomes." *Cochrane Database of Systematic Reviews*(12): N.PAG-N.PAG.
92. Bhattarai, P. and J. Phillips (2017) "The role of digital health technologies in management of pain in older people: an integrative review." *Archives of gerontology and geriatrics* 68, 14-24 DOI: 10.1016/j.archger.2016.08.008.
93. Mickan, S., H. Atherton, N. W. Roberts, C. Heneghan and J. K. Tilson (2014). "Use of handheld computers in clinical practice: A systematic review." *BMC Medical Informatics and Decision Making* 14(1).
94. Fagerström, C., H. Tuveesson, L. Axelsson and L. Nilsson (2017). "The role of ICT in nursing practice: an integrative literature review of the Swedish context." *Scandinavian Journal of Caring Sciences* 31(3): 434-448.
112. Pearce, A. J., B. Adair, K. Miller, E. Ozanne, C. Said, N. Santamaria and M. E. Morris (2012). "Robotics to enable older adults to remain living at home." *J Aging Res* 2012: 538169.
113. Kachouie, R., S. Sedighadeli, R. Khosla and M. T. Chu (2014). "Socially Assistive Robots in Elderly Care: A Mixed-Method Systematic Literature Review." *International Journal of Human-Computer Interaction* 30(5): 369-393.
142. Kosse, N. M., K. Brands, J. M. Bauer, T. Hortobagyi and C. J. C. Lamoth (2013). "Sensor technologies aiming at fall prevention in institutionalized old adults: A synthesis of current knowledge." *International Journal of Medical Informatics* 82(9): 743-752.
143. Walia, G. S., A. L. Wong, A. Y. Lo, G. A. Mackert, H. M. Carl, R. A. Pedreira, R. Bello, C. S. Aquino, W. V. Padula and J. M. Sacks (2016). "Efficacy of Monitoring Devices in Support of Prevention of Pressure Injuries: Systematic Review and Meta-analysis." *Advances in Skin & Wound Care* 29(12): 567-576.
151. Van der Roest, H. G., J. Wenborn, C. Pastink, R. M. Droes and M. Orrell (2017). "Assistive technology for memory support in dementia." *Cochrane Database Syst Rev* 6: Cd009627.
157. Anttila, K., J. Alwin, H. Samuelsson, Salminen, A.-L. and Å. Brandt, (2012). "Quality of evidence of assistive technology interventions for people with disability: An overview of systematic reviews." *Technology & Disability* 24(1): 9-48.
176. Choi, Y.-S., E. Lawler, C. A. Boenecke, E. R. Ponatoski and C. M. Zimring (2011). "Developing a multi-systemic fall prevention model, incorporating the physical environment, the care process and technology: a systematic review." *Journal of Advanced Nursing* 67(12): 2501-2524.
177. Nicolson, A., L. Moir and J. Millsteed (2012). "Impact of assistive technology on family caregivers of children with physical disabilities: a systematic review." *Disability & Rehabilitation: Assistive Technology* 7(5): 345-349.
178. Ofek Shlomai, N., S. Rao and S. Patole (2015). "Efficacy of interventions to improve hand hygiene compliance in neonatal units: a systematic review and meta-analysis." *European Journal of Clinical Microbiology and Infectious Diseases* 34(5): 887-897.
179. Manias, E., A. Williams and D. Liew (2012). "Interventions to reduce medication errors in adult intensive care: A systematic review." *British Journal of Clinical Pharmacology* 74(3): 411-423.
180. Vedel, I., S. Akhlaghpour, I. Vaghefi, H. Bergman and L. Lapointe (2013). "Health information technologies in geriatrics and gerontology: a mixed systematic review." *J Am Med Inform Assoc* 20(6): 1109-1119.
